1  
2  
3  
4  
5  
6  
7  
8  
9  
10  
11  
12  
13  
14  
15  
16  
17  
18  
19  
20  
21  
22  
23  
24  
25  
26  
27

**Lytic bacteriophages facilitate antibiotic sensitization of *Enterococcus faecium***

Gregory S. Canfield,<sup>a,b</sup> Anushila Chatterjee,<sup>b</sup> Juliel Espinosa<sup>c</sup>, Mihnea R. Mangalea,<sup>b</sup> Emma K. Sheriff,<sup>b</sup> Micah Keidan,<sup>b</sup> Sara W. McBride,<sup>b,\*</sup> Bruce D. McCollister,<sup>a</sup> Howard C. Hang<sup>c,d</sup> and Breck A. Duerkop<sup>b,#</sup>

<sup>a</sup>Division of Infectious Diseases, University of Colorado School of Medicine, Aurora, Colorado, USA

<sup>b</sup>Department of Immunology and Microbiology, University of Colorado School of Medicine, Aurora, Colorado, USA

<sup>c</sup>Laboratory of Chemical Biology and Microbial Pathogenesis, The Rockefeller University, New York, New York, USA.

<sup>d</sup>Departments of Immunology & Microbiology and Chemistry, Scripps Research, La Jolla, California, USA.

#Correspondence: Breck A. Duerkop [breck.duerkop@cuanschutz.edu](mailto:breck.duerkop@cuanschutz.edu)

\*Current address: Salk Institute, La Jolla, California, USA

Running Title: Phages enhance antibiotic susceptibility of *E. faecium*

Key words: bacteriophages, *Enterococcus*, antibiotic resistance, phage–bacteria interactions, phage resistance, cephalosporin, beta-lactams

28 **Abstract**

29 *Enterococcus faecium*, a commensal of the human intestine, has emerged as a hospital-  
30 adapted, multi-drug resistant (MDR) pathogen. Bacteriophages (phages), natural predators of bacteria,  
31 have regained attention as therapeutics to stem the rise of MDR bacteria. Despite their potential to  
32 curtail MDR *E. faecium* infections, the molecular events governing *E. faecium*-phage interactions  
33 remain largely unknown. Such interactions are important to delineate because phage selective  
34 pressure imposed on *E. faecium* will undoubtedly result in phage resistance phenotypes that could  
35 threaten the efficacy of phage therapy. In an effort to understand the emergence of phage resistance in  
36 *E. faecium*, three newly isolated lytic phages were used to demonstrate that *E. faecium* phage  
37 resistance is conferred through an array of cell wall-associated molecules, including secreted antigen A  
38 (SagA), enterococcal polysaccharide antigen (Epa), wall teichoic acids, capsule, and an arginine-  
39 aspartate-aspartate (RDD) protein of unknown function. We find that capsule and Epa are important for  
40 robust phage adsorption and that phage resistance mutations in *sagA*, *epaR*, and *epaX* enhance *E.*  
41 *faecium* susceptibility to ceftriaxone, an antibiotic normally ineffective due to its low affinity for  
42 enterococcal penicillin binding proteins. Consistent with these findings, we provide evidence that  
43 phages potentially synergize with cell wall (ceftriaxone and ampicillin) and membrane-acting (daptomycin)  
44 antimicrobials to slow or completely inhibit the growth of *E. faecium*. Our work demonstrates that the  
45 evolution of phage resistance comes with fitness defects resulting in drug sensitization and that lytic  
46 phages could potentially serve as antimicrobial adjuvants in treating *E. faecium* infections.

47

48

49

50

51

52

53

54

## 55 **Introduction.**

56 Enterococci are intestinal commensal bacteria and important opportunistic human pathogens  
57 (1). Of the two most clinically relevant enterococcal species, *Enterococcus faecalis* and *Enterococcus*  
58 *faecium*, the emergence of multidrug resistance is observed most commonly with *E. faecium* (2).  
59 Considering that effective antibiotics with activity against multidrug-resistant (MDR) *E. faecium* are  
60 limited, clinicians are often forced to use antibiotic combination therapy to treat these infections (3).  
61 Although this approach can be life-saving, these regimens increase the risk of patient adverse drug  
62 events, drug-drug interactions, dysbiosis, and may fail to cure the infection (4). Rising from desperate  
63 treatment dilemmas like these are several examples of the successful use of phage therapy to treat  
64 MDR bacterial infections in humans (5-8). These success-stories have motivated renewed interest in  
65 the use of phage therapy for treatment of bacterial infections. Despite this motivation, relatively little is  
66 understood about the bacterial receptors exploited by phages to infect their bacterial hosts and the  
67 counter-measures employed by bacteria to avoid phage infection. We believe that understanding the  
68 molecular events that lead to phage resistance in MDR bacteria may help mitigate the threat of phage  
69 therapy failure.

70 Recently, our group and others have begun to elucidate the molecular mechanisms that enable  
71 successful phage infection of enterococci and the bulk of these studies were performed for *E. faecalis*  
72 and its interactions with tailed dsDNA phages (8-15). The molecular mechanisms enabling phage  
73 infection in *E. faecium* are poorly understood. Our knowledge of potential *E. faecium* phage receptors  
74 comes from an *in vitro* study where the co-existence of phages and *E. faecium* was studied through  
75 multiple passages in laboratory media (12). Whole genome sequencing of phage resistant survivors  
76 showed mutations in the capsule tyrosine kinase *ywqD2* (equivalent to *wze*), RNA polymerase  $\beta$ -  
77 subunit (*rpoC*), several predicted hydrolases, and a cell wall precursor enzyme. It was proposed that  
78 these mutations conferred phage resistance, though direct genetic testing of this hypothesis was not  
79 performed. Tandem-duplications in a putative phage tail fiber gene (EFV12PH11\_98) supported  
80 evolution of phages that overcame adaptive changes that resulted in phage resistance of *E. faecium*  
81 (12).

82 In this work, we expand on our understanding of phage-enterococcal interactions by identifying  
83 genes important for lytic phage infection of clade B strains of *E. faecium*. We have isolated three  
84 previously uncharacterized *E. faecium*-specific phages and show that each belong to the *Siphoviridae*  
85 morphotype of the *Caudovirales* and resemble previously described lytic enterococcal phages (9-11,  
86 14). Protein coding sequence comparison to other enterococcal phages reveals that one phage  
87 belongs to a novel enterococcal phage orthocluster and the remaining two phages belong to previously  
88 described enterococcal phage orthoclusters (16). To identify the molecular determinants of *E. faecium*  
89 phage infection, we used these three phages to generate a collection of *E. faecium* phage resistant  
90 mutants. Phage resistance mutations mapped to genes encoding the cell wall hydrolase secreted  
91 antigen A (*sagA*), putative teichoic acid precursors of the enterococcal polysaccharide antigen (*epa*),  
92 capsule biosynthesis enzymes, and an arginine-aspartate-aspartate (RDD) protein of unknown  
93 function. Capsule and putative teichoic acid biosynthesis proteins were shown to influence phage  
94 adsorption. Considering that all of the genes identified are involved in cell wall biochemistry and/or  
95 architecture, we determined if these phage resistance mutations result in fitness tradeoffs that lead to  
96 altered antimicrobial susceptibility. Phage resistant strains harboring mutations in *sagA*, *epaX*, and  
97 *epaR* showed enhanced susceptibility to cell wall and/or membrane-acting antibiotics, including  
98 ceftriaxone, ampicillin, and daptomycin. We discovered that combining phages with cell wall or  
99 membrane-acting antimicrobials acts synergistically to inhibit the growth of *E. faecium*. These findings  
100 suggest lytic phages might be leveraged as antibiotic adjuvants to offset the emergence of multi-drug  
101 resistant strains of *E. faecium* in hospitalized patients.

102

## 103 **Results.**

104 **Genome sequence analysis and morphology of novel lytic *E. faecium* bacteriophages.** *E.*  
105 *faecium* phages 9181, 9183 and 9184 were isolated from raw sewage by plaque assay using *E.*  
106 *faecium* clade B strains Com12 and 1,141,733 (17). We chose to focus on clade B strains (commensal-  
107 associated) given reports that these strains can serve as a reservoir for transmission of multidrug  
108 resistance plasmids to clade A1 (hospital-associated) strains (18). Evaluation of phage morphology by

109 TEM revealed that all three phages were non-contractile tailed phages characteristic of the *Siphoviridae*  
110 morphotype (Fig. 1) (19). DNA sequence analysis demonstrated that the phage 9181, 9183 and 9184  
111 genomes are 71,854bp, 86,301bp, and 44,601bp in length, respectively (Fig. 1). The genomes of  
112 phages 9181 and 9183 were assembled into single contigs. The phage 9184 genome assembled into  
113 two contigs, with a 53-bp sequencing gap located near the 5' end of a predicted BppU-family phage  
114 baseplate upper protein. In total, 123, 128, and 73 open reading frames (ORFs) were identified for  
115 phages 9181, 9183 and 9184, respectively (Table S1). Genome modularity based on predicted gene  
116 function was observed for each phage genome, however, for phage 9181 the lysin and holin genes are  
117 located at the 5' and 3' termini of the genome (Fig. 1). Functional classifications, consisting of  
118 replication or biosynthesis, DNA packaging, phage particle morphogenesis, nucleic acid restriction and  
119 modification, host cell lysis, sensory function, sugar transferase and a potential  $\beta$ -lactamase, could be  
120 predicted for approximately 30%, 47%, and 48% of the phage 9181, 9183, and 9184 ORFs,  
121 respectively (Table S1). The remaining genes were predicted to be hypothetical genes or genes  
122 containing domains of unknown function. A PCR screen for phage lysogeny in phage-resistant *E.*  
123 *faecium* mutants failed to identify phage 9181, 9183, and 9184 DNA integration within their respective  
124 *E. faecium* host genomes (Table 1; Fig. S1). These data are consistent with a lack of phage DNA  
125 among genomic reads from phage 9181, 9183, and 9184-resistant *E. faecium* mutants and the  
126 absence of turbid plaques, a feature often attributed to lysogenic phages. Together, these data indicate  
127 that phage 9181, 9183, and 9184 are most likely obligate lytic phages when preying on *E. faecium*  
128 Com12 or 1,141,733.

129

### 130 **Comparative genome analysis places phages 9181, 9183, and 9184 in distinct orthoclusters.**

131 Comparative genome analysis of phages 9181, 9183 and 9184 was performed with all publicly  
132 available enterococcal phage genomes using OrthoMCL, an algorithm that identifies clusters of  
133 orthologous proteins from at least two phages enabling phylogenetic categorization of phage proteins  
134 into orthoclusters (16, 20). Of the 10 enterococcal phage orthoclusters originally identified by Bolocan  
135 et al. (16), OrthoMCL clustering places phage 9184 into orthocluster I and phage 9183 into orthocluster

136 X (Fig. 2). Phage 9181 forms a new orthocluster that we have named orthocluster XI (Fig. 2). Whole  
137 genome alignments of phages 9183 and 9184 to their nearest orthocluster neighbors, VPE25 and VFW  
138 for 9183 and vB\_EfaS-DELFI and IME-EFm5 for 9184, revealed conserved protein sequence identity  
139 and similar genome organization (Fig. S2A and S2B). Conversely, phage 9181 shared little protein  
140 sequence identity and genome organization to its nearest neighbors, phage EFC-1 and phage FL4A,  
141 supporting its placement as the sole member of a new orthocluster (Fig. S2C). Higher protein sequence  
142 identity and more similar genome organization was observed for phages belonging to the same  
143 orthocluster rather than phages belonging to different orthoclusters. Since the publication of Bolcan et  
144 al., an additional 45 phage genomes have been made publically available, resulting in the identification  
145 of a 12<sup>th</sup> orthocluster consisting of phages EFA-1 and EFA-2, two recently described phages of  
146 unknown morphology (Fig. 2). Consistent with prior observations of orthocluster I phages, a  $\beta$ -  
147 lactamase domain-containing protein (ORF35) was found in the genome of phage 9184 (Fig. 1 and  
148 Table S1C). Similar to phages in orthocluster X, an integrase-family recombinase was found in the  
149 genome of phage 9183 (Table S1B). However, prior evidence demonstrates that other members of this  
150 orthocluster are unable to lysogenize their *E. faecalis* host (11), which is consistent with absence of  
151 lysogenized phage 9183 in phage 9183 resistant mutants as mentioned above (Fig. S1B).

152

153 ***E. faecium* phages have broad and narrow tropism for laboratory and clinical *E. faecium***  
154 **isolates.** We next sought to determine the host range of each phage against strains of *E. faecium* and  
155 *E. faecalis*. To achieve this, a phage susceptibility assay was performed by spotting 10-fold serially-  
156 diluted enterococcal cultures on Todd-Hewitt broth (THB) agar embedded with phages 9181, 9183 or  
157 9184. A panel of 10 laboratory *E. faecium* isolates and 11 contemporary MDR clinical *E. faecium*  
158 isolates were selected for this analysis (Table S4) (17). An *E. faecium* strain was considered phage-  
159 susceptible if less than  $1 \times 10^5$  CFU/mL were recovered following phage exposure, representing greater  
160 than 4-log of bacterial killing. Phages 9181 and 9183 demonstrated narrow host ranges against  
161 laboratory *E. faecium* strains (Fig. 3A). Besides the host strain on which the phage was isolated  
162 (Com12 for phage 9181 and 1,141,733 for phage 9183), only *E. faecium* Com15 was susceptible to

163 phage 9181, while no other *E. faecium* laboratory strain tested was susceptible to phage 9183.  
164 Contrarily, 60% of the laboratory *E. faecium* strains were susceptible to phage 9184, including clade A  
165 and B strains (Fig. 3A). There was an absence of susceptibility to phage 9181 and 9183, and reduced  
166 susceptibility (~36%) to phage 9184 for the contemporary MDR clinical *E. faecium* isolates (Fig. 3B).  
167 Efficiency of plaquing assay revealed that phages 9181 and 9184 most efficiently plaqued on their  
168 respective host strains (Fig. 3C-D). Together these data show that phage 9184 has a broader host  
169 range compared to phages 9181 and 9183 and that these phages plaque most efficiently on their *E.*  
170 *faecium* host strains, a likely byproduct of repeated phage propagation on the same strain (21).  
171 Interestingly, *E. faecium* 1,231,501 and 1,230,933, the latter of which is a multi-drug resistant clade A  
172 strain, lacked susceptibility to phage 9181, 9183 and 9184. None of the three phages were capable of  
173 infecting any of the 10 clinical *E. faecalis* strains tested (designated UCH12-20 in Table S4), suggesting  
174 that these phages are specific for *E. faecium*.

175

176 **Phage predation elicits spontaneous and stable phage resistance in *E. faecium*.** To identify *E.*  
177 *faecium* genes that are involved in phage infection, we isolated spontaneous phage-resistant *E.*  
178 *faecium* strains following exposure to phages 9181, 9183 and 9184. Phage-resistant isolates were  
179 identified by plating stationary phase cultures of *E. faecium* Com12 and 1,141,733 on THB agar  
180 embedded with phages 9181, 9183, or 9184. Colonies that arose on these plates represented potential  
181 phage-resistant colonies. To confirm the stability of the phage-resistant phenotype, a colony was  
182 serially passaged daily for 3 days on THB agar before re-streaking again on phage embedded THB  
183 agar. The growth of a strain in the presence of phage following serial passage suggested a stable  
184 phage-resistant phenotype (Fig. 4A-C). Six to eight independent phage-resistant strains were further  
185 characterized for phages 9181, 9183 and 9183 (Table 1 and Table S2). For phages 9181 and 9183  
186 resistant *E. faecium* strains (denoted 81R3-8 and 83R1-8, respectively) we observed bacterial growth in  
187 the presence of phages to levels that were similar to bacterial growth in the absence of phages  
188 indicating a strong resistance phenotype (Fig. 4A, 4B and Fig. S3A, S3B, S3D, S3E). However, for  
189 phage 9184 we observed limited phage resistance in all but one presumed *E. faecium* phage resistant



190 isolate (Fig. 4C and Fig. S3C, S3F) suggesting that robust resistance to phage 9184 may be  
191 multifactorial.

192

193 ***E. faecium* phage resistance mutations occur in cell wall biosynthesis and architecture genes**

194 **and a gene encoding a transmembrane protein.** To identify genetic changes conferring a phage

195 resistance phenotype, we performed whole genome DNA sequencing of phage resistant and parental

196 *E. faecium* strains. We observed unique and conserved genome mutations in strains that had

197 developed phage resistance (Fig. 5A-D and Table S2A-C).

198 Five of six mutations identified in phage 9181-resistant strains were detected in *efvg\_rs16270*,

199 which in the *E. faecium* Com12 reference genome is annotated as a hypothetical protein and was

200 flanked by a 5' sequencing gap. Closure of this sequencing gap by PCR and amplicon sequencing

201 revealed that *efvg\_rs16270* encodes the *E. faecium* secreted antigen A (SagA) protein. Whole genome

202 sequencing showed that all *sagA* mutations localized at or near the peptidoglycan clamp or active site

203 residues of the NlpC\_P60 hydrolase domain of SagA, which was recently shown to function as an

204 endopeptidase that cleaves crosslinked Lys-type peptidoglycan fragments (Fig. 5A and Table S2A)

205 (22). To determine the impact of *sagA* mutations on protein structure and function, each single

206 nucleotide polymorphism-associated *sagA* mutant was assessed by Missense 3D analysis (23).

207 BLASTp alignment of SagA from *E. faecium* Com12 and Com15 showed 95% identity along the entire

208 length of the protein and *E. faecium* Com12 and Com15 exhibit identical protein homology in the

209 NlpC\_P60 hydrolase domain (Fig. S4A), suggesting that SagA should be functionally conserved

210 between these two stains. Therefore, we used the *E. faecium* Com15 NlpC\_P60 crystal structure (PDB

211 6B8C) in Missense 3D to assess the impact of residue changes on the structure and function of

212 NlpC\_P60 hydrolase in our *sagA* mutant strains (22). Except for one SagA mutant (81R8; G435V), no

213 structural damaging mutations were found. Using the supernatants and cell pellets of exponentially

214 growing ( $OD_{600} \sim 0.8$ ) wild type and *sagA* mutants, we performed Western blots for SagA expression. All

215 *sagA* mutants produced similar levels of both intracellular and secreted SagA suggesting that these

216 *sagA* mutants are likely catalytically inactive or dampened because of mutations in the NlpC\_P60



217 hydrolase domain (Fig. S4B, S4C, and S4D). We then complemented the *sagA* mutations in phage  
218 9181 resistant strains using a construct previously generated, pAM401-*sagA*, which carries the *sagA*  
219 gene and its native promoter from *E. faecium* Com15 (24). For all *sagA* mutants, complementation  
220 with pAM401-*sagA* restored phage susceptibility (Fig. S5A). These results suggest that SagA  
221 hydrolase activity may be dispensable for *E. faecium* viability and that non-crosslinked peptidoglycan in  
222 *E. faecium* Com12 is important for phage 9181 infection.

223 One phage 9181-resistant strain (81R7) harbored mutations in capsule tyrosine kinase (*wze*)  
224 and topoisomerase III (*topB*) genes and lacked a *sagA* mutation (Table S2A). Similarly, sequencing  
225 analysis of all 9184 resistant strains (84R1-6) revealed an assortment of mutations in the capsule  
226 biosynthesis locus. Nonsense, insertion and deletion mutations were detected in *wze*, capsule  
227 aminotransferase (*efsg\_rs08090*), capsule polymerase (*wzy*), and capsule nucleotide sugar  
228 dehydrogenase (*efsg\_rs08120*) genes (Fig. 5B and Table S2C). Prior co-evolution experiments  
229 between the *Myoviridae* phage 1 and *E. faecium* TX1330 revealed a propensity for *wze* mutations  
230 within an evolved phage resistant *E. faecium* population (12). Our data is consistent with this  
231 observation and suggests that *E. faecium* capsule might serve as a possible receptor and/or adsorption  
232 factor for phage 9181 and 9184. We found that complementation of certain capsule mutants, using the  
233 constitutive expression vector pLZ12A (i.e. 84R2 with *efsg\_rs08120* and 84R5 with *efsg\_rs08090*),  
234 partially restored phage 9184 susceptibility, while complementation of other capsule mutants (i.e. 84R6  
235 and 81R7 each with *wze*) failed to restore phage susceptibility (Fig. S5B-C). This result suggests that  
236 capsule is not a major factor mediating phage resistance to phage 9181 (Fig. S5B) and only weakly  
237 promotes phage 9184 resistance when select capsule genes are mutated (Fig. S5C). These results  
238 emphasize the importance of other non-capsule associated mutations in conferring phage-resistance to  
239 phage 9181 (*sagA*) and phage 9184 (*rdc*). We attempted to address the non-capsule associated  
240 mutation in strain 81R7 (*topB*) and its involvement in phage 9181 resistance, however, all attempts to  
241 clone *topB* into the pLZ12A resulted in truncated *topB* inserts following transformation into *Escherichia*  
242 *coli*, suggesting that constitutive expression of *E. faecium topB* may be toxic to *E. coli*. Similarly, to  
243 address the role of the non-capsule mutation detected in 84R6, which exhibited a robust phage 9184-

244 resistance phenotype, a predicted arginine-aspartate-aspartate gene (*rdd*), this gene was successfully  
245 cloned into pLZ12A yet transformation of this construct into *E. faecium* 84R6 was unsuccessful despite  
246 repeated attempts. Given the ease with which pLZ12A-*wze* and empty pLZ12A vector were  
247 transformed into *E. faecium* 84R6 and our repeated failure to successfully recover transformants  
248 harboring pLZ12A-*rdd* suggests that over-expression of *rdd* in *E. faecium* 84R6 may be lethal.

249 Analysis of *E. faecium* phage 9183 resistant strains (83R1-8) identified mutations in *epa* genes,  
250 *epaR* and *epaX* (Fig. 5D and Table S2B). Mutation of *epaR* and *epaX* results in *E. faecalis* phage  
251 resistance (9, 10, 14) and recently it was determined that the *epaR* and *epaX* genes of *E. faecalis* V583  
252 participate in wall teichoic acid biosynthesis (25). Considering that mutation of the *epaX* homologs  
253 *epaOX* and *epaOX2* from *E. faecalis* OG1RF conferred phage VPE25-resistance by limiting phage  
254 adsorption (10, 11), we suspect that teichoic acids also mediate adsorption of phage 9183 to *E.*  
255 *faecium* 1,141,733. We were surprised that we did not find any phage 9183 resistant strains with  
256 mutations in PIP<sub>EF</sub>, given the high protein homology and similar genome organization observed  
257 between phages 9183, VPE25 and VFW, the latter two which use PIP<sub>EF</sub> as a receptor (11) (Fig. 2 and  
258 Fig. S2A). To confirm that mutations in the *epa* locus confer phage resistance in *E. faecium*, we  
259 pursued a similar complementation strategy as above with the *epaR* and *epaX* mutants identified in the  
260 phage 9183-resistant mutants. All phage 9183-resistant mutants complemented with either the *epaR*  
261 or *epaX* were restored for phage susceptibility (Fig. S5D). Given the importance of D-alanylation in  
262 teichoic acid biosynthesis, we performed complementation with pLZ12A-*dltA* in the *epaX* and *dltA*  
263 double mutant (83R7). We observed that only pLZ12A-*epaX*, not pLZ12A-*dltA*, was capable of  
264 restoring phage susceptibility in 83R7 (Fig. S5D). Considering that *EpaX* acts upstream of *DltA* in the  
265 biosynthesis of teichoic acids (25), these data suggest that *dltA* is dispensable during phage infection,  
266 lending further support to the notion that the *epa* variable locus involved in teichoic acid biosynthesis is  
267 a driver of *E. faecium* infection by phage 9183.

268

269 ***E. faecium* phage resistant mutants have phage adsorption defects.** To determine if phage  
270 adsorption defects occur due to phage resistance, we sought to quantify phage 9181, 9183, and 9184

271 adsorption to wild type and phage resistant *E. faecium* strains using a phage adsorption assay (9, 10,  
272 14). For phage 9181 resistant strains, we observed no significant change in percentage adsorption to  
273 *sagA* mutant strain 81R5, nor phage resistant strain 81R7 harboring a *wze* and *topB* mutations (Fig.  
274 6A). These results are consistent with the inability of *wze* complementation to enhance phage 9181  
275 adsorption in 81R7 (Fig. S6A). This result suggests that mutation of *wze* in *E. faecium* Com12 has little  
276 to no effect on phage 9181 adsorption. Given that SagA is expressed into supernatants of phage 9181  
277 resistant *sagA* mutants, it remains possible that phage 9181 adsorbs to SagA or non-crosslinked  
278 peptidoglycan at the surface of *E. faecium* Com12. Furthermore, it is possible that complementation of  
279 *topB* in the 81R7 background might cause transcriptional or translational changes in surface expressed  
280 molecules enabling enhanced phage 9181 adsorption phenotype (Fig. 6A). Unfortunately, the lack of a  
281 *sagA* knock-out mutant and *topB* complementation vector prevented us from addressing these  
282 questions.

283 Previous work has demonstrated that *epa* mutants exhibit phage adsorption defects in *E.*  
284 *faecalis* (9, 10, 13, 14). Since we observed *epa* mutations that conferred phage 9183 resistance, we  
285 sought to determine if *epa* mutations might promote a similar phenotype in *E. faecium*. We observed a  
286 reduction in phage 9183 adsorption to mutants possessing *epaR* (83R6 and 83R8) and *epaX* (83R4  
287 and 83R7) mutations compared with the parental strain (Fig. 6B). Although *epaX* mutants 83R4 and  
288 83R7 were noted to also have mutations in *gdh* and *dltA*, respectively, we suspect that EpaX was the  
289 driver of this phenotype because of the known role of *epaX* homolog mutations to inhibit phage VPE25  
290 adsorption to *E. faecalis* and that EpaX functions upstream of DltA in the biosynthesis of teichoic acid  
291 (10, 25). Consistent with this notion, we observed that over-expressing *epaR* and *epaX* in phage 9183  
292 resistant mutants, 83R3 and 83R4, harboring mutations in *epaR* and *epaX* regained the ability to  
293 adsorb phage 9183 (Fig. S6B). Taken together, these results suggest that mutations in the *epa* locus of  
294 *E. faecium* lessen phage 9183 adsorption to the surface of its host strain.

295 To determine if mutations in the capsule locus facilitated phage 9184 adsorption defects, we  
296 performed phage 9184 adsorption assays using wild type and phage 9184 resistant mutants. We  
297 observed significant deficits in phage adsorption to strains harboring mutations in capsule polymerase

298 (wzy; 84R1), nucleotide sugar dehydrogenase (*efsg\_rs08120*; 84R4), aminotransferase (*efsg\_rs08090*;  
299 84R5) and tyrosine kinase (*wze*; 84R6) in comparison to the parental strain (Fig. 6C).  
300 Complementation of 84R2 with *efsg\_rs08120* restored phage 9184 adsorption, while complementation  
301 of 84R6 with *wze* partially restored phage 9184 adsorption, albeit the change was statistically non-  
302 significant compared to the empty vector control strain (Fig. S6C). Given that 84R6 also harbors an *rdd*  
303 mutation which encodes a putative transmembrane protein, we cannot definitively conclude that the  
304 adsorption deficit was related to the *wze* mutation, as this *wze* mutation did not cause an adsorption  
305 defect for phage 9181 (Fig. 6A and Fig. S6A). Considering the adsorption defect is greater for the  
306 capsule mutants raised against phages 9184 compared to the phage 9181 capsule mutant 81R7, it is  
307 possible that additional surface associated molecules mediate the attachment of phage 9181 to *E.*  
308 *faecium* cells. Together, these data indicate that *E. faecium* capsule contributes to phage 9184  
309 adsorption and may be phage specific.

310

311 ***E. faecium* phage resistance enhances  $\beta$ -lactam and lipopeptide susceptibility.** With renewed  
312 interest focused on utilizing lytic phages for the treatment of bacterial infections and the observation  
313 that phage resistance can be a fitness tradeoff under antibiotic pressure (26, 27), we sought to  
314 determine the impact of *E. faecium* phage resistance on antimicrobial susceptibility. We performed  
315 antimicrobial susceptibility screening using E-test strips for the phage 9181, 9183, and 9184 resistant  
316 mutants compared to their parental strains to determine if phage resistance altered *E. faecium*  
317 antimicrobial susceptibility. For phage 9181 resistant mutants, we observed a ~2-5 fold reduction in the  
318 minimum inhibitory concentration (MIC) of ampicillin and an overall reduction in the MIC of ceftriaxone  
319 (Table S3A). Interestingly, the enhancement of ampicillin and ceftriaxone susceptibility correlated with  
320 phage 9181 resistant mutants harboring mutations in *sagA*, and not *wze* or *topB*. For phage 9183  
321 resistant mutants, we also observed a 3-5 fold reduction in the MIC of ampicillin and an overall  
322 reduction in the MIC of ceftriaxone (Table S3B). Additionally, we noted a 2.5-5 fold reduction in the  
323 MIC of daptomycin, a lipopeptide class antimicrobial, which was not observed for the phage 9181 or  
324 9184 resistant mutants. These results suggest that the acquisition of phage resistance via mutation of

325 *sagA* and *epa* genes in *E. faecium* is a fitness defect that manifests as enhanced  $\beta$ -lactam  
326 susceptibility.

327 No phage capsule mutants showed a significant difference in antimicrobial susceptibility to  $\beta$ -  
328 lactams or lipopeptides, suggesting that mutations to the *E. faecium* capsule locus and *rdd* avoid the  
329 cost of increased antimicrobial susceptibility to  $\beta$ -lactams and daptomycin (Table S3C).

330

331 **Lytic phages synergize with  $\beta$ -lactam and lipopeptide antimicrobials to inhibit the growth of *E.***

332 ***faecium*.** Considering the antibiotic fitness cost associated with phage resistance in *E. faecium*, we

333 hypothesized that phages 9181 and 9183 would be capable of synergizing with ampicillin, ceftriaxone,

334 and daptomycin to inhibit the growth of *E. faecium*. To address this question, we performed phage-

335 antibiotic synergy assays where *E. faecium* was grown in the presence of phages alone, sub-inhibitory

336 concentrations of ampicillin, ceftriaxone, or daptomycin alone, or a combination of phage and a sub-

337 inhibitory concentration of antibiotics (Fig. 7A-E). For all three antibiotics, we observed that the

338 combination of phage and sub-inhibitory concentrations of antibiotics were able to inhibit the growth of

339 *E. faecium* better than phage or antibiotic alone. Given the absence of growth inhibition of *E. faecium*

340 in the presence of sub-inhibitory concentrations of antibiotics alone, this result is consistent with a

341 synergistic antimicrobial interaction between phages and antibiotics. Interestingly, the synergy

342 observed between phages 9181 and 9183 and ceftriaxone appeared more potent than the synergy

343 observed between these phages and ampicillin (Fig. 7A-D). A dose-response relationship emerged

344 when ampicillin was combined with phages 9181 and 9183 where decreasing concentrations of

345 ampicillin enabled varying degrees of bacterial population recovery (Fig. 7A-B). These data suggest

346 that phages 9181 and 9183 could serve as useful adjuvants in combination with  $\beta$ -lactams for the

347 treatment of *E. faecium* infections by restoring the susceptibility to *E. faecium* strains harboring intrinsic

348  $\beta$ -lactam resistance. We also observed that the combination of phage 9183 and daptomycin slowed the

349 growth of *E. faecium* 1,141,733 more than phage 9183 alone or daptomycin alone (Fig. 7E). This

350 suggests that phage 9183 also synergizes with daptomycin to inhibit *E. faecium* 1,141,733. These

351 results are consistent with those observed by Morrisette et al. who observed synergy between the

352 *Myoviridae* phage 113 and  $\beta$ -lactam (ampicillin, ertapenem and ceftaroline) and lipopeptide  
353 antimicrobials against daptomycin-resistant and tolerant strains of *E. faecium* (28).

354

## 355 **Discussion.**

356         Considering the treatment pitfalls due to worsening drug resistance in *E. faecium* and other  
357 bacterial pathogens, the biomedical community is revisiting the use of phage therapy. Since phage  
358 therapy's departure from 20<sup>th</sup> century Western Medicine, new technologies have emerged that have  
359 facilitated fine-scale resolution of phage-bacterial molecular interactions. Despite these advancements,  
360 for many bacteria, including *E. faecium*, the molecular factors exploited by phages for infection remain  
361 largely understudied (12). We believe that studying the molecular interactions of phages with their *E.*  
362 *faecium* hosts will inform rational approaches for future phage therapies against this pathogen.

363         In this work, we describe three novel lytic phages of *E. faecium*. Using protein coding orthology,  
364 we show that one of these phages, phage 9181, forms a new orthocluster from the ten previously  
365 described enterococcal phage orthoclusters (16). We show that these phages are specific for *E.*  
366 *faecium* and exhibit broad and narrow strain tropism. Using whole genome sequencing and  
367 comparative genomics, we provide evidence that *sagA*, *epa*, and capsule biosynthesis genes are  
368 important for phage infection of *E. faecium*. We were unable to fully assess if the genes *topB* and *rdd*  
369 are important in conferring phage 9181 and phage 9184 resistance, respectively. We suspect that  
370 these genes aid in phage-*E. faecium* interactions. Consistent with previous observations in *E. faecalis*  
371 (9, 10, 13, 14), we show that mutations in *epaR* and *epaX* limit phage 9183 adsorption to *E. faecium*,  
372 albeit to a lesser extent than that observed for similar mutations in *E. faecalis*. For example, the  
373 difference in phage VPE25 adsorption to wild type *E. faecalis* versus an *epaOX* mutant was ~80% (10),  
374 compared with the ~35% reduction in phage 9183 adsorption to an *epaX* (*epaOX* homolog) mutant  
375 (Fig. 6B). This weaker phage 9183 adsorption despite the inability to infect the host closely resembles  
376 the ~50% reduction in phage SHEF2 adherence to an *epaB* and OPDV\_11720 (encoding an *epaX*-like  
377 glycosyltransferase) mutants compared to wild type *E. faecalis* (29, 30). The partial adsorption of phage  
378 9183 to *epaR* and *epaX* mutants despite phage resistance suggests that phage 9183 adherence might



379 also depend on the core Epa rhamnopolysaccharide, in addition to Epa teichoic acid decorations,  
380 similar to phage SHEF2 (29). We show for the first time that mutations in the capsule locus, which is  
381 absent in *E. faecalis* (17), limits phage 9184 adsorption to *E. faecium* 1,141,733, but not phage 9181  
382 adsorption to *E. faecium* Com12. The ~50% reduction in phage 9184 adsorption in capsule mutants  
383 (Fig. 6C), is comparable to the ~60-80% reduction of phages Ycsa and 8 against acapsular  
384 *Streptococcus thermophilus* (31).

385 Our investigation into fitness tradeoffs associated with *E. faecium* phage resistance revealed  
386 enhanced susceptibility to cell wall and membrane-acting antibiotics. We demonstrated that phages  
387 9181 and 9183 synergize with cell wall and membrane-targeting antibiotics to more potently inhibit *E.*  
388 *faecium*. Importantly, this analysis revealed that phages 9181 and 9183 could sensitize *E. faecium* to  
389 ceftriaxone, an antibiotic that normally promotes enterococcal colonization of the intestine due to  
390 intrinsic resistance (32). Phage synergy with ceftriaxone is an important discovery as it suggests a  
391 strategy to re-sensitize enterococci to a third-generation cephalosporin. Exposure to cell wall-acting  
392 agents is recognized as a key event prior to hospital-acquired enterococcal infection in susceptible  
393 patients and cephalosporin re-sensitization could have a broad impact on anti-enterococcal therapy (2,  
394 33). Cephalosporin activity pressures the native intestinal microbiota altering its ecology and related  
395 mucosal immunity, creating a scenario for enterococci to thrive and become dominant members of the  
396 microbiota (33-36). In patients with weakened immune systems or made vulnerable from hospital  
397 procedures such as surgeries, bone marrow ablative chemotherapy, or pre-existing alcoholic  
398 hepatitis/cirrhosis, these ceftriaxone-associated conditions can tip the scale in favor of infection (33-35,  
399 37, 38). Even in *E. faecium* strains with ampicillin susceptibility, synergy with ceftriaxone for the  
400 treatment of endocarditis was demonstrated to be not absolute, suggesting that current Infectious  
401 Disease Society of America guidelines for the treatment of *E. faecium* endocarditis may lead to sub-  
402 optimal results (39, 40). Combination therapy with phage and cell wall or membrane-acting  
403 antimicrobials may offer a potential solution to circumvent this issue, while avoiding the risk associated  
404 with exposing patients to combination  $\beta$ -lactam agents.



405 The underlying molecular mechanisms conferring enhanced susceptibility to beta-lactams in  
406 *sagA*, *epaR* and *epaX* mutants remain unclear. Given that intrinsic resistance of *E. faecium* to  
407 ceftriaxone is derived, in part, from class A and B penicillin binding proteins (Pbps) (41-44), we  
408 hypothesize that modification of the surface architectural display of Pbps in *epaR*, *epaX*, and *sagA*  
409 mutants might facilitate this phenotype. Parallels to *E. faecium sagA* mutants can be drawn from  
410 mutation of a secreted peptidoglycan hydrolase in *E. faecalis*, SalB, which also demonstrates enhanced  
411 susceptibility to cephalosporins (45). Pairwise amino acid alignment of *E. faecium* Com12 SagA and *E.*  
412 *faecalis* SalB revealed 51% identity over the N-terminal coiled-coil domain region, which is expected  
413 given their different C-terminal hydrolase domains (SCP in SalB; NlpC\_P60 in SagA). Contrary to *sagA*  
414 in *E. faecium*, *salB* was shown to be non-essential in *E. faecalis*, and has a homolog (*salA*) which may  
415 partly compensate for the function of *salB* to maintain cell viability (45). Staining of an *E. faecalis salB*  
416 mutant with a non-specific, fluorescent penicillin (Bocillin FL) revealed no difference from wild type.  
417 However, this analysis was performed in the absence of ceftriaxone pre-treatment, potentially masking  
418 subtle changes in the abundance of Pbps in the *salB* mutant at the cell wall (41). Therefore, it remains  
419 unclear if SalB partners with or coordinates the activity of Pbps to induce cephalosporin resistance. A  
420 *sagA* mutant described in our study (81R5; G460D) has a mutation residing two residues upstream  
421 from a peptidoglycan clamp residue (W462) and lacked enhanced susceptibility to ampicillin and  
422 ceftriaxone. The reason for this exception and why this mutation confers phage resistance is unclear.

423 The enhanced susceptibility to  $\beta$ -lactams in *epaR* and *epaX* in *E. faecium* mutants was  
424 surprising given prior reports of increased  $\beta$ -lactam resistance in *epa* mutants in *E. faecalis* (46).  
425 However, we note that all *epa* mutants tested in that analysis harbored mutations in genes from the  
426 core region of *epa* locus (i.e. *epaA*, *epaE*, *epaL*, *epaN*, *epaB*). To the best of our knowledge, this is the  
427 first report demonstrating enhanced  $\beta$ -lactam sensitivity to *epa* variable region mutants in enterococci.  
428 We observed enhanced susceptibility to daptomycin in *E. faecium epaR* and *epaX* mutants, consistent  
429 with data from *E. faecalis epaR* and *epaX* mutants (9, 14, 47). Given that the *epa* variable genes have  
430 recently been discovered to be involved in teichoic acid biosynthesis (25), we hypothesize that altered  
431 display of teichoic acids at the cell surface enables the differential  $\beta$ -lactam and daptomycin

432 susceptibility observed in *epa* core versus variable region mutants in enterococci. This hypothesis is  
433 supported by observations in *Staphylococcus aureus*, where metabolic perturbations leading to  
434 enhanced teichoic acid output or teichoic acid D-alanylation correlate with daptomycin tolerance (48-  
435 50). Similarly, mutation of *lafB*, a gene encoding lipoteichoic acid glycosyltransferase, induces a  
436 daptomycin hypersusceptible phenotype in *E. faecium* (51). Mutation of *bgsB* in *E. faecalis*, which  
437 functions with a *lafB* homolog (*bgsA*) in lipoteichoic acid anchor biosynthesis, results in enhanced  
438 susceptibility to daptomycin (14). A reduction in susceptibility to the  $\beta$ -lactam piperacillin in *lafB* (*E.*  
439 *faecium*) or *bgsB* (*E. faecalis*) mutants is reminiscent of the effect of *epa* core region mutations in  
440 enterococci (46). A similar pattern of enhanced daptomycin susceptibility at the cost of reduced  $\beta$ -  
441 lactam susceptibility, known as the see-saw effect (52), suggests that the altered display or abundance  
442 of the wall teichoic acids at the cell surface may occur in response to the modification of  
443 rhamnopolysaccharide or lipoteichoic acid. Mutation of *epaR* or *epaX* in *E. faecium* would potentially  
444 avoid the daptomycin- $\beta$ -lactam see-saw effect, making phages that induce these mutations in  
445 enterococci attractive antimicrobial candidates. Collectively, these observations suggest that the  
446 location of *epa* mutations, core versus variable region, as well mutations in genes participating in  
447 teichoic acid biosynthesis, are likely to impact the trajectory of  $\beta$ -lactam and daptomycin susceptibility in  
448 enterococci.

449 *E. faecalis epa* mutations are detrimental during intestinal colonization and show reduced  
450 virulence in a mouse peritonitis infection model (9, 53, 54). *epa* mutants are more susceptible to bile  
451 salts, neutrophils, exhibit reduced biofilm formation, and are unable to invade biotic and abiotic surfaces  
452 (47, 54-56). Therefore, we predict that *epaR* and *epaX* mutants in *E. faecium* will show a similar  
453 intestinal colonization dysfunction. Hydrolase-domain mutations in *SagA* are also likely to induce fitness  
454 costs *in vivo*. *SagA* was shown to promote *E. faecium* attachment to multiple connective tissue  
455 molecules, including fibrinogen, fibronectin, and collagen (57). Interestingly, peptidoglycan fragments  
456 released following *SagA* hydrolytic activity activates NOD2-mediated mucosal immunity in the intestine,  
457 providing protection from *Salmonella enterica* infection and *Clostridioides difficile* pathogenesis (22,  
458 24). In *E. faecalis*, mutation of the *sagA*-like gene *salB* altered cell morphology, increased biofilm

459 formation, impacted autolysis, and increased susceptibility to bile salts, detergent, ethanol, peroxide,  
460 and heat (58-61). Contrary to SagA, cells expressing SalB were limited in binding fibronectin and  
461 collagen type I, suggesting that these proteins exhibit different adherence capacities to host tissue.  
462 Considering these observations together, it is possible that phage predation that promotes the  
463 formation of *sagA* mutants would result in *E. faecium* cells that are compromised for adherence and/or  
464 invasion of host tissues, and potentially less immunostimulatory during infection.

465         The absence of phage-antibiotic synergy for phage resistant strains harboring capsule,  
466 topoisomerase 3 (*topB*), and the *rdd* gene does not imply that these mutations do not come with a  
467 fitness cost for other antimicrobial agents. We selectively chose to examine beta-lactams and  
468 daptomycin in this study given their clinical relevance for treating enterococcal infections. Sensitization  
469 to other antibiotics that target pathways other than cell wall biogenesis or membrane stability may exist  
470 and remain to be tested. The presence of phage-antibiotic synergy might be a function of how a  
471 mutation inhibits phage infection. For instance, bacterial mutations that limit phage adsorption and/or  
472 genome ejection (i.e. *epa*, *sagA*) into the host cell might result in sensitivity to agents acting at the cell  
473 wall or membrane, while mutations that might inhibit phage genome replication (i.e. *topB*) could  
474 sensitize cells to agents that block bacterial DNA replication. Sensitization of *E. coli* to novobiocin, a  
475 topoisomerase inhibitor, following mutation of *topB* (a type I topoisomerase) supports this theory (62).  
476 Additionally, purified capsule from *Streptococcus pneumoniae* was shown to protect an acapsular  
477 mutant of *Klebsiella pneumoniae* from polymyxin B (63), a lipopeptide antibiotic that normally binds  
478 lipopolysaccharide in the outer membrane of Gram-negative bacteria (64). *E. faecalis epa* variable  
479 locus mutants are also sensitized to polymyxin B (30), suggesting phage resistance sensitizes  
480 enterococci to other antibiotics for which they exhibit intrinsic resistance (64).

481         Although phage-antibiotic synergy represents an enticing approach for treatment of multi-drug  
482 resistant *E. faecium* infections, the narrow host range observed for phages 9181 and 9183 (Fig. 3A-B)  
483 will need to be addressed in future studies. Ideal phages would exhibit broader host range activity while  
484 retaining synergy with antibiotics. Whether such phages exist in the natural environment is unclear. If

485 not, phage recombineering methods offer promise for precisely broadening the host range of phages  
486 (65-67).

487         Despite their narrow host range, phages 9181 and 9183 can discriminate between members of  
488 *E. faecium* clade B. The inability of phage 9183 to infect *E. faecium* Com12 despite this strain  
489 exhibiting a near identical *epa* locus compared to 1,141,733 (i.e. *epa* variant 2) (17, 18), suggests  
490 phage 9183 might adsorb to Com12 but is unable to infect the cell either due to an inability to bind a  
491 secondary receptor, intracellular restriction, or failure to effectively lyse the cell following intracellular  
492 phage replication and assembly. What drives phage 9181 specificity for *E. faecium* Com12 and  
493 Com15, but not 1,141,733 is not clear. Given the near identical *SagA* amino acid sequences between  
494 *E. faecium* Com12 and 1,141,733 (Identity 97%, Positives 97%, Gaps 2%) suggests that architecture of  
495 the peptidoglycan or a mechanism highlighted above for phage 9183 resistance enable *E. faecium*  
496 1,141,733 resistance to phage 9181 infection. Future studies will seek to identify further host factors  
497 that constrain the host range of these phages.

498         Phage 9184 infects both clade A and B strains. Given the heterogenous nature of the capsule  
499 loci between the strains infected by phage 9184, it is difficult to ascertain an attribute of this loci that  
500 might serve as a determinant of phage 9184 adsorption and infectivity. Acknowledging that the  
501 arginine-aspartate-aspartate (RDD) protein has yet to be proven as a receptor for phage 9184, the  
502 conservation of this protein in *E. faecium* Com12, which is not infected by phage 9184, suggests that  
503 RDD is not the factor limiting infection of this strain.

504         In conclusion, we have identified three previously undescribed phages that infect *E. faecium*.  
505 The study of *E. faecium* resistance to these phages identified multiple components of the *E. faecium*  
506 cell surface to be critical for productive phage infection. The enhanced sensitivity of *sagA*, *epaR* and  
507 *epaX* mutants to cell wall and membrane acting antimicrobials suggests that these proteins represent  
508 intriguing antimicrobial targets to be considered for future drug discovery efforts against *E. faecium*, and  
509 potentially other Gram-positive pathogens harboring homologs of these genes. The finding that *E.*  
510 *faecium* phages synergize with  $\beta$ -lactam and lipopeptide antibiotics provides encouragement that

511 phages could be used in combination with these antibiotics to increase their efficacy and possibly  
512 repurpose such antibiotics that are currently deemed ineffective against enterococci.

513

#### 514 **Materials and Methods.**

515 **Bacteria and bacteriophages.** A complete list of the bacterial strains and bacteriophages used in this  
516 study can be found in Table S4. *E. faecium* Com12 was cultured in Todd-Hewitt broth (THB) and *E.*  
517 *faecium* 1,141,733 was cultured in brain heart infusion (BHI) broth at 37°C with rotation at 250 rpm. *E.*  
518 *coli* strains were cultured in Lennox L broth (LB) at 37°C with rotation at 250 rpm. Semi-solid media in  
519 petri plates were made by adding 1.5% agar to broth prior to autoclaving. For antibiotic susceptibility  
520 testing, Mueller Hinton Broth (MHB) was used. When needed, chloramphenicol was added to media at  
521 20 µg/ml or 10 µg/ml for selection of *E. coli* or *E. faecium*, respectively. Phage susceptibility assays  
522 were performed on THB agar supplemented with 10 mM MgSO<sub>4</sub>.

523

524 **Bacteriophage isolation and purification.** Phages 9181, 9183, and 9184 were isolated from  
525 wastewater obtained from a water treatment facility located near Denver, Colorado. Fifty milliliters of  
526 raw sewage was centrifuged at 3220 x g for 10 minutes at room temperature to remove debris. The  
527 supernatant was decanted and passed through a 0.45 µm filter. A 100 µl aliquot of filtered wastewater  
528 was mixed with 130 µl of *E. faecium* 1,141,733 or Com12 diluted 1:10 from an overnight culture and  
529 incubated at room temperature for 15 min. Molten THB top agar (0.35%), supplemented with 10 mM  
530 MgSO<sub>4</sub>, was added to the bacteria-wastewater suspension and poured over a 1.5% THB agar plate  
531 supplemented with 10 mM MgSO<sub>4</sub>. Following overnight growth at 37°C, plaques were picked with a  
532 sterile Pasteur pipette and phages were eluted from the plaque in 500 µl SM-plus buffer (100 mM NaCl,  
533 50 mM Tris-HCl, 8 mM MgSO<sub>4</sub>, 5 mM CaCl<sub>2</sub> [pH 7.4]) overnight (O/N) at 4°C. After O/N elution, the  
534 phages were filter sterilized (0.45 µm). This procedure was repeated two more times to ensure clonal  
535 phage isolates. To amplify phages to high titer stocks, 10-fold serially diluted clonal phage isolates were  
536 mixed with their appropriate host strain diluted 1:10 from an O/N culture, incubated at room  
537 temperature and then poured over 1.5% THB agar supplemented with 10 mM MgSO<sub>4</sub>. Top agar from

538 multiple near confluent lysed bacterial lawns were scraped into a 15 ml conical tube and centrifuged at  
539 18000 x g for 10 minutes prior to decanting and 0.45 µm filter sterilization. Using these recovered  
540 phages, high-titer phage stocks were generated by infecting 500 mL of early logarithmically ( $2-3 \times 10^8$   
541 CFU/mL) growing *E. faecium* with phage at a multiplicity of infection of 0.5 following supplementation of  
542 media with 10 mM MgSO<sub>4</sub>. The phage-cell suspension was incubated at room temperature for 15 min  
543 and then incubated at 37°C with rotation (200 rpm) for 4-6 hours. The cultures were centrifuged at  
544 3220 x g for 10 minutes at 4°C and the supernatants filtered (0.45 µm). Clarified and filtered lysates  
545 were treated with 5 µg/ml each of DNase and RNase at room temperature for 1 hour and phages were  
546 precipitated with 1 M NaCl and 10% (wt/vol) polyethylene glycol 8000 (PEG 8000) on ice at 4°C  
547 overnight. Phage precipitates were pelleted by centrifugation at 11,270 x g for 20 minutes and  
548 resuspended in 2 mL of SM-plus buffer. One-third volume chloroform was mixed by inversion into the  
549 phage precipitates and centrifuged at 16,300 x g to separate out residual PEG 8000 into the organic  
550 phase. Phages in the aqueous phase were further purified using a cesium chloride gradient as  
551 described previously (11). The final titer was confirmed by plaque assay. Crude phage lysates were  
552 used for all phage susceptibility and adsorption assays, while cesium chloride gradient purified phages  
553 were used for phage genomic DNA isolation and transmission electron microscopy.

554

555 **Transmission electron microscopy.** 8 µl of  $1 \times 10^{10}$  pfu/mL of phages was applied to a copper mesh  
556 grid coated with formvar and carbon (Electron Microscopy Sciences) for 2 minutes and then gently  
557 blotted off with a piece of Whatman filter paper. The grids were rinsed by transferring between two  
558 drops of MilliQ water, blotting with Whatman filter paper between each transfer. Finally, the grids were  
559 stained using two drops of a 0.75% uranyl formate solution (a quick rinse with MilliQ water following the  
560 first drop followed by an additional 20 seconds of staining). After rinsing and blotting, the grids were  
561 allowed to dry for at least 10 minutes. Samples were imaged on a FEI Tecnai G2 Biotwin TEM at 80kV  
562 with an AMT side-mount digital camera.

563



564 **Whole-genome sequence analysis of phages and phage-resistant bacteria.** Phage DNA was  
565 isolated by incubating phages with 50 µg/mL proteinase K and 0.5% sodium dodecyl sulfate at 56°C for  
566 1 hour followed by extraction with an equal volume of phenol/chloroform. The aqueous phase was  
567 extracted a second time with an equal volume of chloroform and the DNA was precipitated using  
568 isopropanol. Bacterial DNA was isolated using a ZymoBIOMICS DNA miniprep kit (Zymo Research),  
569 following the manufacturers protocol. Phage and bacterial DNA samples were sequenced at the  
570 Microbial Genome Sequencing Center, University of Pittsburgh, using an Illumina NextSeq 550 platform  
571 and paired end chemistry (2 x 150bp). Paired-end reads were trimmed and assembled into contigs  
572 using CLC genomics workbench (Qiagen). Open reading frames (ORFs) were detected and annotated  
573 using rapid annotation subsystem technology (RAST) and the Phage Galaxy structural annotation  
574 (version 2020.1) and functional workflows (version 2020.3) (68, 69). Trimmed bacterial genomic reads  
575 for *E. faecium* Com12, 1,141,733, and phage resistant derivatives were mapped to reference genomes  
576 (GCF\_000157635.1 (Com12); GCA\_000157575.1 (1,141,733)), downloaded from the National Center  
577 for Biotechnology Information (NCBI) website. To identify mutations conferring phage resistance the  
578 basic variant detection tool from CLC genomics workbench was used to identify polymorphisms  
579 (similarity fraction = 0.5 and length fraction = 0.8).

580

581 **PCR screen for phage lysogeny.** PCR primers to screen for phage 9181, 9183, and 9184 lysogeny  
582 were designed to target the phage lysin (phage 9181 and 9184) or integrase (phage 9183) genes  
583 (Table S4). PCR was performed using GoTaq Green master mix (Promega), per the manufacturer's  
584 instructions. Bands were visualized from PCR reactions following electrophoresis of 10 µL of each  
585 reaction loaded onto 1% (phage 9184) or 1.5% (phage 9181 and 9183) agarose gels embedded with  
586 ethidium bromide. Predicted PCR product sizes were as follows: phage 9181 lysin gene  
587 (phi9181\_ORF001), 432bp; phage 9183 integrase gene (phi9183\_ORF077), 514bp; phage 9184 lysin  
588 gene (phi9184\_ORF022), 801bp.

589

590



591 **Enterococcal phage orthology analysis.** Enterococcal phage orthology was performed according to  
592 a method described by Bolocan et al. (16). Briefly, publicly available enterococcal genomes were  
593 downloaded from the Millard Lab phage genome database (<http://millardlab.org/bioinformatics/>). As of  
594 May 15, 2020, there were 99 complete enterococcal phage genomes. Open reading frames for each  
595 enterococcal phage genome were called using Prodigal and bacteriophage protein Orthologous Groups  
596 were identified by OrthoMCL (20, 70). The resulting OrthoMCL matrix was used to generate an  
597 orthology tree using the ggplot2 and ggdendro packages in R. Nearest neighbor phages to phages  
598 9181, 9183, and 9184 from the OrthoMCL analysis were compared using the genome alignment  
599 feature of ViP Tree using normalized tBLASTx scores between viral genomes to calculate genomic  
600 distance for phylogenetic proteomic tree analysis (71).

601  
602 **Routine molecular techniques, DNA sequencing, and complementation.** Confirmation PCRs were  
603 performed using GoTaq Green master mix (Promega), per the manufacturer's instructions. Q5 DNA  
604 polymerase master mix (New England Biolabs) was used for PCR reactions intended for cloning, per  
605 the manufacturer's instructions. Plasmid DNA was purified using a QIAprep Miniprep kit (Qiagen) or a  
606 ZymoPURE II Plasmid Midiprep kit (Zymo Research). Restriction enzymes and T4 ligase were  
607 purchased from New England Biolabs. Sanger DNA sequencing was performed by Quintara  
608 Biosciences (San Francisco, CA). A complete list of primers can be found in Table S4.  
609 Complementation was performed using plasmid pLZ12A, a derivative of pLZ12 (72) carrying the *bacA*  
610 promoter upstream of the multiple cloning site (9). *wze*, *epaX*, *dltA*, and *efsg\_rs08090* were cloned into  
611 pLZ12A as BamHI and EcoRI fragments. *epaR* and *efsg\_rs08120* were cloned into pLZ12A as BamHI  
612 and PstI fragments. Plasmids were transformed into *E. faecium* using a previously described glycine-  
613 sucrose method (73, 74). Briefly, 1 ml of overnight culture was inoculated into 50 ml of BHI  
614 supplemented with 2% glycine and 0.5 M sucrose and grown overnight at 37°C with rotation (250 rpm).  
615 The following day the cells were pelleted at 7200 x *g* and re-suspended in an equal volume of pre-  
616 warmed BHI supplemented with 2% glycine and 0.5 M sucrose and incubated for 1h at 37°C statically.  
617 The cells were pelleted at 7200 x *g* and washed three times in ice cold electroporation buffer (0.5 M

618 sucrose and 10% glycerol). 1-2 µg of plasmid DNA was electroporated into *E. faecium* using a Gene  
619 Pulser (Bio-Rad) with a 0.2 mm cuvette at 1.7kV, 200 Ω and 25 µF.

620

621 **Phage susceptibility assay.** Overnight bacterial cultures were pelleted, re-suspended in SM-plus  
622 buffer, and normalized to OD<sub>600</sub> of 1.0. 10-fold serial dilutions of bacteria were spotted on THB agar  
623 embedded with phage or THB agar alone, supplemented with 10 mM MgSO<sub>4</sub>. Phages were embedded  
624 at the following concentrations within THB agar: phage 9181 (10<sup>8</sup> PFU/ml), phage 9183 (10<sup>7</sup> PFU/ml),  
625 and phage 9184 (10<sup>7</sup> PFU/ml). Plates were incubated overnight at 37°C and viable CFU was  
626 determined by colony counting.

627

628 **Isolation of phage-resistant *E. faecium* strains.** 130 µl of a 1:10 dilution of *E. faecium* grown O/N  
629 was mixed with 10 µl of 10-fold serially diluted phages and added to 5 ml of pre-warmed THB top agar  
630 (0.35% wt/vol). Phage-bacterium mixtures were poured onto the surface of THB agar plates (1.5%  
631 wt/vol). The plates were incubated at 37°C until phage-resistant colonies appeared in the zones of  
632 clearing. The presumptive resistant colonies were passaged four times by streaking single colonies  
633 onto THB agar.

634

635 **Determination of phage host range.** The host range of phages 9181, 9183, and 9184 were  
636 determined using a panel of laboratory and contemporary clinical *E. faecium* and *E. faecalis* isolates  
637 (Table S4). Overnight bacterial cultures were suspended in SM-plus buffer to an OD<sub>600</sub> of 1.0 and 10-  
638 fold serially diluted and spotted on to THB agar containing phages. Plates were incubated O/N at 37°C  
639 and viable CFU was determined. Strains that exhibited greater than 4-log killing in the presence of  
640 phage were termed phage susceptible, while those that grew beyond this threshold were considered  
641 phage resistant.

642

643 **Efficiency of plating.** Bacterial strains of interest were selected from a single colony to inoculate 3 mL  
644 THB and incubated O/N at 37°C with agitation. Bacteria from O/N cultures were 1:10 diluted in SM-plus

645 buffer and 130  $\mu$ L was mixed gently with 10  $\mu$ L of phage 9181 and phage 9184 serially 1:10 diluted in  
646 SM-plus buffer using starting titers of  $5 \times 10^6$  pfu and  $1 \times 10^7$  pfu, respectively. This phage and  
647 bacterial mixture was incubated at room temperature for 15 minutes to enable phage attachment before  
648 5 mL of pre-warmed THB soft agar (0.35% wt/vol) supplemented with 10 mM magnesium sulfate was  
649 mixed in and spread over the surface of THB agar (1.5% wt/vol) supplemented with 10 mM magnesium  
650 sulfate. The soft agar was allowed to solidify and then incubated O/N at 37°C with the petri dish upright  
651 to prevent dislodgement of the soft agar. Phage plaques were enumerated following O/N incubation.  
652 Given our difficulties forming an evenly spread plaque layer of phage 9184 on *E. faecium* U37 (75), 6  
653  $\mu$ L of 10-fold serial dilutions of phage 9184 were spotted onto bacterial lawns of *E. faecium* U37 or  
654 1,141,733 embedded in THB soft agar (0.35 wt/vol) supplemented with 10 mM magnesium sulfate  
655 containing either. Following drying of spots, plates were incubated upright O/N at 37°C. Plaques were  
656 enumerated following O/N incubation.

657

658 **Western blot analysis for SagA from bacterial supernatants and pellets.** Western blot was  
659 performed as described previously (22). Briefly, bacteria were grown to exponential phase ( $OD_{600} \sim 0.8$ )  
660 in BHI. 1 mL exponential phase culture samples were centrifuged at  $\geq 18,000 \times g$  and the supernatants  
661 were transferred to a new microcentrifuge tube for preparation. Supernatants were prepared as follows:  
662 10% trichloroacetic acid (final; vol/vol) was added and tubes placed at -20°C for 15 minutes for protein  
663 precipitation. Tubes were then spun at max speed for 15 minutes, supernatant discarded, and the  
664 protein pellet was washed twice with 500  $\mu$ L cold acetone. Tubes were transferred to a 95°C heat block  
665 with caps open to evaporate acetone and dry protein pellets. 60  $\mu$ L 4% sodium dodecyl sulfate (SDS)  
666 buffer (4% SDS, 50 mM Bis-Tris pH 7.5, 150 mM sodium chloride, 1X Laemmli Buffer, 2.5%  $\beta$ -  
667 mercaptoethanol) was added to the protein pellets, which were sonicated for 5 minutes to solubilize.  
668 The samples were then placed at 95°C for 5 minutes to denature proteins. Cell pellets were prepared  
669 as follows: 1 mL cell pellets were resuspended with 1 mL phosphate buffered saline, transferred to 2  
670 mL cryovials, and centrifuged at 5000  $\times g$  for 5 minutes to wash. After discarding supernatant, 50  $\mu$ L  
671 0.1 mm beads were added followed by 250  $\mu$ L 4% SDS buffer (see above). Cryovial tubes were placed

672 in a FastPrep FP120 cell disruptor at max speed for 20 seconds on and 10 seconds off, and this  
673 process was repeated twice more. Tubes were then centrifuged at 5000 x g for one minute and then  
674 placed at 95°C for 10 minutes to remove bubbles & denature proteins. 15 µL of 60 µL supernatant or  
675 cell pellet sample was loaded for SDS-PAGE. Proteins were separated by SDS-PAGE on 4–20%  
676 Criterion TGX precast gels (Bio-Rad), then transferred to nitrocellulose membrane (0.2 mM, BioTrace  
677 NT Nitrocellulose Transfer Membranes, Pall Laboratory). For SagA blots, polyclonal SagA serum and  
678 HRP conjugated anti-Rabbit IgG (GE Healthcare, NA 934V) served as primary and secondary  
679 antibodies, respectively. Polyclonal SagA primary antibodies and secondary antibody were used at a  
680 dilution of 1:25000 and 1:10000 (supernatants) or 1:10000 and 1:5000 (cell pellets), respectively.  
681 Membranes were blocked for one hour in TBS-T (Tris-buffered saline, 0.1% Tween 20) containing 5%  
682 non-fat milk, incubated with blocking buffer containing primary antibody for one hour, washed five times  
683 with TBS-T, incubated with blocking buffer containing secondary antibody, and washed four times with  
684 TBS-T. Protein detection was performed with ECL detection reagent (GE Healthcare) on a Bio-Rad  
685 ChemiDoc MP Imaging System.

686

687 **Bacterial growth curves.** 250 mL BHI was inoculated with 2.5 mL (1:100) overnight cultures and  
688 incubated at 37°C with agitation until OD<sub>600</sub> ~0.8.

689

690 **Phage adsorption assay.** This assay was performed as described previously (10, 11). O/N bacterial  
691 cultures were pelleted at 3220 × g for 10 min and resuspended to 10<sup>8</sup> CFU/mL in SM-plus buffer. Phage  
692 adsorption was determined by mixing 5 × 10<sup>6</sup> pfu of phage and to 5 × 10<sup>7</sup> cfu of the appropriate  
693 bacterial strain in 500 µL and incubating statically at room temperature for 10 min. The bacteria-phage  
694 suspensions were centrifuged at 24,000 × g for 1 min, the supernatant was collected, and remaining  
695 phages enumerated by a plaque assay. SM-plus buffer with phage only (no bacteria) served as a  
696 control. Percent adsorption was determined as follows: [(PFU<sub>control</sub> – PFU<sub>test supernatant</sub>)/PFU<sub>control</sub>] × 100.  
697 The fold change was calculated by dividing the percent adsorption of phage resistant mutants by those  
698 of parental strain.

699

700 **Antibiotic MIC assay.** Antibiotic MIC was determined for each strain using Etest strips (bioMérieux).  
701 Single colonies were grown O/N in 3 mL of MHB broth at 37°C with rotation (250 rpm). The following  
702 day overnight cultures were diluted to McFarland 0.5 in MHB broth and 100 µL of the cell suspension  
703 was spread over the surface of MHB agar plates. One Etest strip was placed on the surface of the agar  
704 using sterile forceps. The plates were incubated for 18 hours at 37°C. The MIC was determined to be  
705 the number closest to the zone of inhibition. The mean and standard deviation of the MIC from three  
706 independent experiments is reported for each strain.

707

708 **Phage-antibiotic synergy assay.** O/N cultures of *E. faecium* Com12 and *E. faecium* 1,141,733 were  
709 normalized to 10<sup>8</sup> CFU/mL. 100 µl (10<sup>7</sup> CFU/mL) of bacteria was added into a sterile 96-well plate in  
710 triplicate. Antibiotics were diluted 1:100 into desired wells to achieve the appropriate final  
711 concentration. Phages were added to desired wells at 10<sup>6</sup> PFU/mL, achieving a multiplicity of infection  
712 of 0.1. The 96 well plate was loaded on to BioTek Synergy Plate reader pre-warmed to 37°C, and  
713 agitated continuously for 18h, allowing for OD<sub>600</sub> reading every 30 minutes.

714

715 **Data availability.** The Illumina reads for phage 9181, 9183, and 9184 and phage-resistant *E. faecium*  
716 mutants have been deposited in the European Nucleotide Archive under the accession number  
717 PRJEB39873. Assembled phage genomes were submitted to Genbank and were assigned the  
718 following accession numbers: MT939240 (phage 9181), MT939241 (phage 9183), and MT939242  
719 (phage 9184).

720

#### 721 **Acknowledgements.**

722 This work was supported by National Institutes of Health grants R01AI141479 (B.A.D.), R01GM103593  
723 (H.C.H), R01CA245292 (H.C.H.), T32AI070084 (J.E.), and T32AR007534 (M.R.M). J.E. acknowledges  
724 support from The Rockefeller University Graduate Program and H.C.H. acknowledges support from a  
725 Kenneth Rainin Foundation Synergy Award. We thank Dr. Jennifer Bourne at the University of Colorado

726 School of Medicine Electron Microscopy Center for preparing and visualizing electron micrographs of  
727 phages. We thank the staff at the Microbial Genome Sequencing Center (MiGS) at the University of  
728 Pittsburgh for assistance with bacterial and phage whole genome DNA sequencing.

729

### 730 **References.**

- 731 1. Arias CA, Murray BE. 2012. The rise of the Enterococcus: beyond vancomycin resistance. *Nat*  
732 *Rev Microbiol* 10:266-78. doi:10.1038/nrmicro2761.
- 733 2. Kristich CJ, Rice LB, Arias CA. 2014. Enterococcal infection—treatment and antibiotic  
734 resistance, p 1-62. *In* Gilmore MS, Clewell DB, Ike Y, Shakar N (ed), *Enterococci : from*  
735 *commensals to leading causes of drug resistant infection [Internet]*. Massachusetts Eye and Ear  
736 Infirmary, Boston, MA.
- 737 3. Beganovic M, Luther MK, Rice LB, Arias CA, Rybak MJ, LaPlante KL. 2018. A review of  
738 combination antimicrobial therapy for *Enterococcus faecalis* bloodstream infections and infective  
739 endocarditis. *Clin Infect Dis* 67:303-309. doi:10.1093/cid/ciy064.
- 740 4. Rybak MJ, McGrath BJ. 1996. Combination antimicrobial therapy for bacterial infections.  
741 Guidelines for the clinician. *Drugs* 52:390-405. doi:10.2165/00003495-199652030-00005.
- 742 5. Fish R, Kutter E, Bryan D, Wheat G, Kuhl S. 2018. Resolving digital staphylococcal  
743 osteomyelitis using bacteriophage-a case report. *Antibiotics (Basel)* 7:87.  
744 doi:10.3390/antibiotics7040087.
- 745 6. Cano EJ, Caflisch KM, Bollyky PL, Van Belleghem JD, Patel R, Fackler J, Brownstein MJ,  
746 Horne B, Biswas B, Henry M, Malagon F, Lewallen DG, Suh GA. 2020. Phage therapy for limb-  
747 threatening prosthetic knee *Klebsiella pneumoniae* infection: case report and in vitro  
748 characterization of anti-biofilm activity. *Clin Infect Dis* doi:10.1093/cid/ciaa705.  
749 doi:10.1093/cid/ciaa705.

- 750 7. Schooley RT, Biswas B, Gill JJ, Hernandez-Morales A, Lancaster J, Lessor L, Barr JJ, Reed SL,  
751 Rohwer F, Benler S, Segall AM, Taplitz R, Smith DM, Kerr K, Kumaraswamy M, Nizet V, Lin L,  
752 McCauley MD, Strathdee SA, Benson CA, Pope RK, Leroux BM, Picel AC, Mateczun AJ, Cilwa  
753 KE, Regeimbal JM, Estrella LA, Wolfe DM, Henry MS, Quinones J, Salka S, Bishop-Lilly KA,  
754 Young R, Hamilton T. 2017. Development and use of personalized bacteriophage-based  
755 therapeutic cocktails to treat a patient with a disseminated resistant *Acinetobacter baumannii*  
756 infection. *Antimicrob Agents Chemother* 61:e00954-17. doi:10.1128/AAC.00954-17.
- 757 8. Chan BK, Turner PE, Kim S, Mojibian HR, Elefteriades JA, Narayan D. 2018. Phage treatment  
758 of an aortic graft infected with *Pseudomonas aeruginosa*. *Evol Med Public Health* 2018:60-66.  
759 doi:10.1093/emph/eoy005.
- 760 9. Chatterjee A, Johnson CN, Luong P, Hullahalli K, McBride SW, Schubert AM, Palmer KL,  
761 Carlson PE, Jr., Duerkop BA. 2019. Bacteriophage resistance alters antibiotic-mediated  
762 intestinal expansion of enterococci. *Infect Immun* 87:e00085-19. doi:10.1128/iai.00085-19.
- 763 10. Chatterjee A, Willett JLE, Nguyen UT, Monogue B, Palmer KL, Dunny GM, Duerkop BA. 2020.  
764 Parallel genomics uncover novel enterococcal-bacteriophage interactions. *mBio* 11:e03120-19.  
765 doi:10.1128/mBio.03120-19.
- 766 11. Duerkop BA, Huo W, Bhardwaj P, Palmer KL, Hooper LV. 2016. Molecular basis for lytic  
767 bacteriophage resistance in enterococci. *mBio* 7:e01304-16. doi:10.1128/mBio.01304-16.
- 768 12. Wandro S, Oliver A, Gallagher T, Weihe C, England W, Martiny JBH, Whiteson K. 2018.  
769 Predictable molecular adaptation of coevolving *Enterococcus faecium* and lytic phage EfV12-  
770 phi1. *Front Microbiol* 9:3192. doi:10.3389/fmicb.2018.03192.
- 771 13. Lossouarn J, Briet A, Moncaut E, Furlan S, Bouteau A, Son O, Leroy M, DuBow MS, Lecoite F,  
772 Serror P, Petit MA. 2019. *Enterococcus faecalis* countermeasures defeat a virulent Picovirinae  
773 bacteriophage. *Viruses* 11:48. doi:10.3390/v11010048.



- 774 14. Ho K, Huo W, Pas S, Dao R, Palmer KL. 2018. Loss-of-function mutations in *epaR* confer  
775 resistance to phiNPV1 Infection in *Enterococcus faecalis* OG1RF. *Antimicrob Agents*  
776 *Chemother* 62:e00758-18. doi:10.1128/AAC.00758-18.
- 777 15. Duerkop BA, Palmer KL, Horsburgh MJ. 2014. Enterococcal bacteriophages and genome  
778 defense, p 1-44. *In* Gilmore MS, Clewell DB, Ike Y, Shankar N (ed), *Enterococci: from*  
779 *commensals to leading causes of drug resistant infection*. Massachusetts Eye and Ear  
780 Infirmary, Boston.
- 781 16. Bolocan AS, Upadrasta A, Bettio PHA, Clooney AG, Draper LA, Ross RP, Hill C. 2019.  
782 Evaluation of phage therapy in the context of *Enterococcus faecalis* and its associated  
783 diseases. *Viruses* 11:366. doi:10.3390/v11040366.
- 784 17. Palmer KL, Godfrey P, Griggs A, Kos VN, Zucker J, Desjardins C, Cerqueira G, Gevers D,  
785 Walker S, Wortman J, Feldgarden M, Haas B, Birren B, Gilmore MS. 2012. Comparative  
786 genomics of enterococci: variation in *Enterococcus faecalis*, clade structure in *E. faecium*, and  
787 defining characteristics of *E. gallinarum* and *E. casseliflavus*. *mBio* 3:e00318-11.  
788 doi:10.1128/mBio.00318-11.
- 789 18. de Been M, van Schaik W, Cheng L, Corander J, Willems RJ. 2013. Recent recombination  
790 events in the core genome are associated with adaptive evolution in *Enterococcus faecium*.  
791 *Genome Biol Evol* 5:1524-35. doi:10.1093/gbe/evt111.
- 792 19. Ackermann HW. 2007. 5500 Phages examined in the electron microscope. *Arch Virol* 152:227-  
793 43. doi:10.1007/s00705-006-0849-1.
- 794 20. Li L, Stoeckert CJ, Jr., Roos DS. 2003. OrthoMCL: identification of ortholog groups for  
795 eukaryotic genomes. *Genome Res* 13:2178-89. doi:10.1101/gr.1224503.

- 796 21. Holtzman T, Globus R, Molshanski-Mor S, Ben-Shem A, Yosef I, Qimron U. 2020. A continuous  
797 evolution system for contracting the host range of bacteriophage T7. *Sci Rep* 10:307.  
798 doi:10.1038/s41598-019-57221-0.
- 799 22. Kim B, Wang YC, Hespen CW, Espinosa J, Salje J, Rangan KJ, Oren DA, Kang JY, Pedicord  
800 VA, Hang HC. 2019. *Enterococcus faecium* secreted antigen A generates muropeptides to  
801 enhance host immunity and limit bacterial pathogenesis. *Elife* 8:e45343.  
802 doi:10.7554/eLife.45343.
- 803 23. Ittisoponpisan S, Islam SA, Khanna T, Alhuzimi E, David A, Sternberg MJE. 2019. Can  
804 predicted protein 3D structures provide reliable insights into whether missense variants are  
805 disease associated? *J Mol Biol* 431:2197-2212. doi:10.1016/j.jmb.2019.04.009.
- 806 24. Rangan KJ, Pedicord VA, Wang YC, Kim B, Lu Y, Shaham S, Mucida D, Hang HC. 2016. A  
807 secreted bacterial peptidoglycan hydrolase enhances tolerance to enteric pathogens. *Science*  
808 353:1434-1437. doi:10.1126/science.aaf3552.
- 809 25. Guerardel Y, Sadovskaya I, Maes E, Furlan S, Chapot-Chartier MP, Mesnage S, Rigottier-Gois  
810 L, Serron P. 2020. Complete structure of the enterococcal polysaccharide antigen (EPA) of  
811 vancomycin-resistant *Enterococcus faecalis* V583 Reveals that EPA decorations are teichoic  
812 acids covalently linked to a rhamnopolysaccharide backbone. *mBio* 11:e00277-20.  
813 doi:10.1128/mBio.00277-20.
- 814 26. Kortright KE, Chan BK, Koff JL, Turner PE. 2019. Phage therapy: a renewed approach to  
815 combat antibiotic-resistant bacteria. *Cell Host Microbe* 25:219-232.  
816 doi:10.1016/j.chom.2019.01.014.
- 817 27. Mangalea MR, Duerkop BA. 2020. Fitness trade-offs resulting from bacteriophage resistance  
818 potentiate synergistic antibacterial strategies. *Infect Immun* 88:e00926-19.  
819 doi:10.1128/IAI.00926-19.

- 820 28. Morrisette T, Lev KL, Kebriaei R, Abdul-Mutakabbir J, Stamper KC, Morales S, Lehman SM,  
821 Canfield GS, Duerkop BA, Arias CA, Rybak MJ. 2020. Bacteriophage-antibiotic combinations for  
822 *Enterococcus faecium* with varying bacteriophage and daptomycin susceptibilities. Antimicrob  
823 Agents Chemother 64:e00993-20. doi:10.1128/AAC.00993-20.
- 824 29. Al-Zubidi M, Widziolak M, Court EK, Gains AF, Smith RE, Ansbro K, Alrafaie A, Evans C,  
825 Murdoch C, Mesnage S, Douglas CWI, Rawlinson A, Stafford GP. 2019. Identification of Novel  
826 Bacteriophages with Therapeutic Potential That Target *Enterococcus faecalis*. Infect Immun  
827 87:e00512-19. doi:10.1128/iai.00512-19.
- 828 30. Smith RE, Salamaga B, Szkuta P, Hajdamowicz N, Prajsnar TK, Bulmer GS, Fontaine T,  
829 Kolodziejczyk J, Herry JM, Hounslow AM, Williamson MP, Serror P, Mesnage S. 2019.  
830 Decoration of the enterococcal polysaccharide antigen EPA is essential for virulence, cell  
831 surface charge and interaction with effectors of the innate immune system. PLoS Pathog  
832 15:e1007730. doi:10.1371/journal.ppat.1007730.
- 833 31. Rodriguez C, Van der Meulen R, Vaningelgem F, Font de Valdez G, Raya R, De Vuyst L, Mozzi  
834 F. 2008. Sensitivity of capsular-producing *Streptococcus thermophilus* strains to bacteriophage  
835 adsorption. Lett Appl Microbiol 46:462-8. doi:10.1111/j.1472-765X.2008.02341.x.
- 836 32. Rice LB, Lakticová V, Helfand MS, Hutton-Thomas R. 2004. In vitro antienterococcal activity  
837 explains associations between exposures to antimicrobial agents and risk of colonization by  
838 multiresistant enterococci. J Infect Dis 190:2162-6. doi:10.1086/425580.
- 839 33. Ubeda C, Taur Y, Jenq RR, Equinda MJ, Son T, Samstein M, Viale A, Succi ND, van den Brink  
840 MR, Kamboj M, Pamer EG. 2010. Vancomycin-resistant *Enterococcus* domination of intestinal  
841 microbiota is enabled by antibiotic treatment in mice and precedes bloodstream invasion in  
842 humans. J Clin Invest 120:4332-41. doi:10.1172/JCI43918.

- 843 34. Brandl K, Plitas G, Mihu CN, Ubeda C, Jia T, Fleisher M, Schnabl B, DeMatteo RP, Pamer EG.  
844 2008. Vancomycin-resistant enterococci exploit antibiotic-induced innate immune deficits.  
845 Nature 455:804-7. doi:10.1038/nature07250.
- 846 35. Donskey CJ, Chowdhry TK, Hecker MT, Hoyen CK, Hanrahan JA, Hujer AM, Hutton-Thomas  
847 RA, Whalen CC, Bonomo RA, Rice LB. 2000. Effect of antibiotic therapy on the density of  
848 vancomycin-resistant enterococci in the stool of colonized patients. N Engl J Med 343:1925-32.  
849 doi:10.1056/NEJM200012283432604.
- 850 36. Hendrickx AP, Top J, Bayjanov JR, Kemperman H, Rogers MR, Paganelli FL, Bonten MJ,  
851 Willems RJ. 2015. Antibiotic-driven dysbiosis mediates intraluminal agglutination and alternative  
852 segregation of *Enterococcus faecium* from the intestinal epithelium. mBio 6:e01346-15.  
853 doi:10.1128/mBio.01346-15.
- 854 37. Duan Y, Llorente C, Lang S, Brandl K, Chu H, Jiang L, White RC, Clarke TH, Nguyen K,  
855 Torralba M, Shao Y, Liu J, Hernandez-Morales A, Lessor L, Rahman IR, Miyamoto Y, Ly M,  
856 Gao B, Sun W, Kiesel R, Hutmacher F, Lee S, Ventura-Cots M, Bosques-Padilla F, Verna EC,  
857 Abrales JG, Brown RS, Jr., Vargas V, Altamirano J, Caballeria J, Shawcross DL, Ho SB,  
858 Louvet A, Lucey MR, Mathurin P, Garcia-Tsao G, Bataller R, Tu XM, Eckmann L, van der Donk  
859 WA, Young R, Lawley TD, Starkel P, Pride D, Fouts DE, Schnabl B. 2019. Bacteriophage  
860 targeting of gut bacterium attenuates alcoholic liver disease. Nature 575:505-511.  
861 doi:10.1038/s41586-019-1742-x.
- 862 38. Stein-Thoeringer CK, Nichols KB, Lazrak A, Docampo MD, Slingerland AE, Slingerland JB,  
863 Clurman AG, Armijo G, Gomes ALC, Shono Y, Staffas A, Burgos da Silva M, Devlin SM,  
864 Markey KA, Bajic D, Pinedo R, Tsakmaklis A, Littmann ER, Pastore A, Taur Y, Monette S, Arcila  
865 ME, Pickard AJ, Maloy M, Wright RJ, Amoretti LA, Fontana E, Pham D, Jamal MA, Weber D,  
866 Sung AD, Hashimoto D, Scheid C, Xavier JB, Messina JA, Romero K, Lew M, Bush A,  
867 Bohannon L, Hayasaka K, Hasegawa Y, Vehreschild M, Cross JR, Ponce DM, Perales MA,

- 868 Giralt SA, Jenq RR, Teshima T, Holler E, Chao NJ, et al. 2019. Lactose drives *Enterococcus*  
869 expansion to promote graft-versus-host disease. *Science* 366:1143-1149.  
870 doi:10.1126/science.aax3760.
- 871 39. Baddour LM, Wilson WR, Bayer AS, Fowler VG, Jr., Tleyjeh IM, Rybak MJ, Barsic B, Lockhart  
872 PB, Gewitz MH, Levison ME, Bolger AF, Steckelberg JM, Baltimore RS, Fink AM, O'Gara P,  
873 Taubert KA, American Heart Association Committee on Rheumatic Fever E, Kawasaki Disease  
874 of the Council on Cardiovascular Disease in the Young CoCCCoCS, Anesthesia, Stroke C.  
875 2015. Infective endocarditis in adults: diagnosis, antimicrobial therapy, and management of  
876 complications: a scientific statement for healthcare professionals from the American Heart  
877 Association. *Circulation* 132:1435-86. doi:10.1161/CIR.0000000000000296.
- 878 40. Lorenzo MP, Kidd JM, Jenkins SG, Nicolau DP, Housman ST. 2019. In vitro activity of ampicillin  
879 and ceftriaxone against ampicillin-susceptible *Enterococcus faecium*. *J Antimicrob Chemother*  
880 74:2269-2273. doi:10.1093/jac/dkz173.
- 881 41. Djoric D, Little JL, Kristich CJ. 2020. Multiple low-reactivity class B penicillin-binding proteins are  
882 required for cephalosporin resistance in enterococci. *Antimicrob Agents Chemother* 64:e02273-  
883 19. doi:10.1128/AAC.02273-19.
- 884 42. Arbeloa A, Segal H, Hugonnet JE, Josseaume N, Dubost L, Brouard JP, Gutmann L, Mengin-  
885 Lecreux D, Arthur M. 2004. Role of class A penicillin-binding proteins in PBP5-mediated beta-  
886 lactam resistance in *Enterococcus faecalis*. *J Bacteriol* 186:1221-8. doi:10.1128/jb.186.5.1221-  
887 1228.2004.
- 888 43. Rice LB, Carias LL, Rudin S, Hutton R, Marshall S, Hassan M, Josseaume N, Dubost L, Marie  
889 A, Arthur M. 2009. Role of class A penicillin-binding proteins in the expression of beta-lactam  
890 resistance in *Enterococcus faecium*. *J Bacteriol* 191:3649-56. doi:10.1128/JB.01834-08.

- 891 44. Sifaoui F, Arthur M, Rice L, Gutmann L. 2001. Role of penicillin-binding protein 5 in expression  
892 of ampicillin resistance and peptidoglycan structure in *Enterococcus faecium*. *Antimicrob Agents*  
893 *Chemother* 45:2594-7. doi:10.1128/aac.45.9.2594-2597.2001.
- 894 45. Djoric D, Kristich CJ. 2017. Extracellular SalB contributes to intrinsic cephalosporin resistance  
895 and cell envelope integrity in *Enterococcus faecalis*. *J Bacteriol* 199:e00392-17.  
896 doi:10.1128/JB.00392-17.
- 897 46. Singh KV, Murray BE. 2019. Loss of a major enterococcal polysaccharide antigen (Epa) by  
898 *Enterococcus faecalis* is associated with increased resistance to ceftriaxone and carbapenems.  
899 *Antimicrob Agents Chemother* 63:e00481-19. doi:10.1128/aac.00481-19.
- 900 47. Dale JL, Cagnazzo J, Phan CQ, Barnes AM, Dunny GM. 2015. Multiple roles for *Enterococcus*  
901 *faecalis* glycosyltransferases in biofilm-associated antibiotic resistance, cell envelope integrity,  
902 and conjugative transfer. *Antimicrob Agents Chemother* 59:4094-105. doi:10.1128/AAC.00344-  
903 15.
- 904 48. Gaupp R, Lei S, Reed JM, Peisker H, Boyle-Vavra S, Bayer AS, Bischoff M, Herrmann M,  
905 Daum RS, Powers R, Somerville GA. 2015. *Staphylococcus aureus* metabolic adaptations  
906 during the transition from a daptomycin susceptibility phenotype to a daptomycin  
907 nonsusceptibility phenotype. *Antimicrob Agents Chemother* 59:4226-38.  
908 doi:10.1128/AAC.00160-15.
- 909 49. Mechler L, Bonetti EJ, Reichert S, Flotenmeyer M, Schrenzel J, Bertram R, Francois P, Gotz F.  
910 2016. Daptomycin tolerance in the *Staphylococcus aureus pitA6* mutant is due to upregulation  
911 of the *dlt* operon. *Antimicrob Agents Chemother* 60:2684-91. doi:10.1128/AAC.03022-15.
- 912 50. Bertsche U, Weidenmaier C, Kuehner D, Yang SJ, Baur S, Wanner S, Francois P, Schrenzel J,  
913 Yeaman MR, Bayer AS. 2011. Correlation of daptomycin resistance in a clinical *Staphylococcus*

- 914 *aureus* strain with increased cell wall teichoic acid production and D-alanylation. Antimicrob  
915 Agents Chemother 55:3922-8. doi:10.1128/AAC.01226-10.
- 916 51. Mello SS, Van Tyne D, Lebreton F, Silva SQ, Nogueira MCL, Gilmore MS, Camargo I. 2020. A  
917 mutation in the glycosyltransferase gene *lafB* causes daptomycin hypersusceptibility in  
918 *Enterococcus faecium*. J Antimicrob Chemother 75:36-45. doi:10.1093/jac/dkz403.
- 919 52. Sieradzki K, Tomasz A. 1997. Inhibition of cell wall turnover and autolysis by vancomycin in a  
920 highly vancomycin-resistant mutant of *Staphylococcus aureus*. Journal of Bacteriology  
921 179:2557-2566. doi:10.1128/jb.179.8.2557-2566.1997.
- 922 53. Xu Y, Singh KV, Qin X, Murray BE, Weinstock GM. 2000. Analysis of a gene cluster of  
923 *Enterococcus faecalis* involved in polysaccharide biosynthesis. Infect Immun 68:815-23.  
924 doi:10.1128/iai.68.2.815-823.2000.
- 925 54. Rigottier-Gois L, Madec C, Navickas A, Matos RC, Akary-Lepage E, Mistou MY, Serror P. 2015.  
926 The surface rhamnopolysaccharide epa of *Enterococcus faecalis* is a key determinant of  
927 intestinal colonization. J Infect Dis 211:62-71. doi:10.1093/infdis/jiu402.
- 928 55. Mohamed JA, Huang W, Nallapareddy SR, Teng F, Murray BE. 2004. Influence of origin of  
929 isolates, especially endocarditis isolates, and various genes on biofilm formation by  
930 *Enterococcus faecalis*. Infect Immun 72:3658-63. doi:10.1128/iai.72.6.3658-3663.2004.
- 931 56. Ramos Y, Rocha J, Hael AL, van Gestel J, Vlamakis H, Cywes-Bentley C, Cubillos-Ruiz JR,  
932 Pier GB, Gilmore MS, Kolter R, Morales DK. 2019. PolyGlcNAc-containing exopolymers enable  
933 surface penetration by non-motile *Enterococcus faecalis*. PLoS Pathog 15:e1007571.  
934 doi:10.1371/journal.ppat.1007571.
- 935 57. Teng F, Kawalec M, Weinstock GM, Hryniewicz W, Murray BE. 2003. An *Enterococcus faecium*  
936 secreted antigen, SagA, exhibits broad-spectrum binding to extracellular matrix proteins and



- 937 appears essential for *E. faecium* growth. Infect Immun 71:5033-41. doi:10.1128/iai.71.9.5033-  
938 5041.2003.
- 939 58. Breton YL, Mazé A, Hartke A, Lemarinier S, Auffray Y, Rincé A. 2002. Isolation and  
940 characterization of bile salts-sensitive mutants of *Enterococcus faecalis*. Current Microbiology  
941 45:0434-0439. doi:10.1007/s00284-002-3714-3.
- 942 59. Rincé A, Le Breton Y, Verneuil N, Giard J-C, Hartke A, Auffray Y. 2003. Physiological and  
943 molecular aspects of bile salt response in *Enterococcus faecalis*. International Journal of Food  
944 Microbiology 88:207-213. doi:10.1016/s0168-1605(03)00182-x.
- 945 60. Mohamed JA, Teng F, Nallapareddy SR, Murray BE. 2006. Pleiotropic effects of 2  
946 *Enterococcus faecalis* *sagA*-like genes, *salA* and *salB*, which encode proteins that are antigenic  
947 during human infection, on biofilm formation and binding to collagen type i and fibronectin. J  
948 Infect Dis 193:231-40. doi:10.1086/498871.
- 949 61. Shankar J, Walker RG, Wilkinson MC, Ward D, Horsburgh MJ. 2012. SalB inactivation  
950 modulates culture supernatant exoproteins and affects autolysis and viability in *Enterococcus*  
951 *faecalis* OG1RF. J Bacteriol 194:3569-78. doi:10.1128/JB.00376-12.
- 952 62. Perez-Cheeks BA, Lee C, Hayama R, Marians KJ. 2012. A role for topoisomerase III in  
953 *Escherichia coli* chromosome segregation. Mol Microbiol 86:1007-22. doi:10.1111/mmi.12039.
- 954 63. Llobet E, Tomas JM, Bengoechea JA. 2008. Capsule polysaccharide is a bacterial decoy for  
955 antimicrobial peptides. Microbiology (Reading) 154:3877-3886. doi:10.1099/mic.0.2008/022301-  
956 0.
- 957 64. Zavascki AP, Goldani LZ, Li J, Nation RL. 2007. Polymyxin B for the treatment of multidrug-  
958 resistant pathogens: a critical review. Journal of Antimicrobial Chemotherapy 60:1206-1215.  
959 doi:10.1093/jac/dkm357.

- 960 65. Dunne M, Rupf B, Tala M, Qabrati X, Ernst P, Shen Y, Sumrall E, Heeb L, Pluckthun A,  
961 Loessner MJ, Kilcher S. 2019. Reprogramming bacteriophage host range through structure-  
962 guided design of chimeric receptor binding proteins. *Cell Rep* 29:1336-1350 e4.  
963 doi:10.1016/j.celrep.2019.09.062.
- 964 66. Burrowes BH, Molineux IJ, Fralick JA. 2019. Directed in vitro evolution of therapeutic  
965 bacteriophages: the appelmans protocol. *Viruses* 11:241. doi:10.3390/v11030241.
- 966 67. Yehl K, Lemire S, Yang AC, Ando H, Mimee M, Torres MT, de la Fuente-Nunez C, Lu TK. 2019.  
967 Engineering phage host-range and suppressing bacterial resistance through phage tail fiber  
968 mutagenesis. *Cell* 179:459-469 e9. doi:10.1016/j.cell.2019.09.015.
- 969 68. Aziz RK, Bartels D, Best AA, DeJongh M, Disz T, Edwards RA, Formsma K, Gerdes S, Glass  
970 EM, Kubal M, Meyer F, Olsen GJ, Olson R, Osterman AL, Overbeek RA, McNeil LK, Paarmann  
971 D, Paczian T, Parrello B, Pusch GD, Reich C, Stevens R, Vassieva O, Vonstein V, Wilke A,  
972 Zagnitko O. 2008. The RAST Server: rapid annotations using subsystems technology. *BMC*  
973 *Genomics* 9:75. doi:10.1186/1471-2164-9-75.
- 974 69. Mijalis E, Rasche H. 2013-2017. CPT galaxy tools. <https://github.com/tamu-cpt/galaxy-tools/>  
975 Accessed 1 May 2020.
- 976 70. Hyatt D, Chen GL, Locascio PF, Land ML, Larimer FW, Hauser LJ. 2010. Prodigal: prokaryotic  
977 gene recognition and translation initiation site identification. *BMC Bioinformatics* 11:119.  
978 doi:10.1186/1471-2105-11-119.
- 979 71. Nishimura Y, Yoshida T, Kuronishi M, Uehara H, Ogata H, Goto S. 2017. ViPTree: the viral  
980 proteomic tree server. *Bioinformatics* 33:2379-2380. doi:10.1093/bioinformatics/btx157.

- 981 72. Perez-Casal J, Caparon MG, Scott JR. 1991. Mry, a trans-acting positive regulator of the M  
982 protein gene of *Streptococcus pyogenes* with similarity to the receptor proteins of two-  
983 component regulatory systems. J Bacteriol 173:2617-24. doi:10.1128/jb.173.8.2617-2624.1991.
- 984 73. Shepard BD, Gilmore MS. 1995. Electroporation and efficient transformation of *Enterococcus*  
985 *faecalis* grown in high concentrations of glycine. Methods Mol Biol 47:217-26. doi:10.1385/0-  
986 89603-310-4:217.
- 987 74. Zhang X, Paganelli FL, Bierschenk D, Kuipers A, Bonten MJ, Willems RJ, van Schaik W. 2012.  
988 Genome-wide identification of ampicillin resistance determinants in *Enterococcus faecium*.  
989 PLoS Genet 8:e1002804. doi:10.1371/journal.pgen.1002804.
- 990 75. Rice LB, Carias LL, Donskey CL, Rudin SD. 1998. Transferable, plasmid-mediated VanB-type  
991 glycopeptide resistance in *Enterococcus faecium*. Antimicrob Agents Chemother 42:963-4.
- 992 76. Mihara T, Nishimura Y, Shimizu Y, Nishiyama H, Yoshikawa G, Uehara H, Hingamp P, Goto S,  
993 Ogata H. 2016. Linking virus genomes with host taxonomy. Viruses 8:66.  
994 doi:10.3390/v8030066.

995

## 996 **Figure Legends.**

### 997 **Figure 1. Genome organization and morphogenesis of three previously uncharacterized *E.***

998 ***faecium* phages.** Whole genome sequencing reveals a modular functional organization of phage

999 9181, 9183 and 9184 genomes. Open reading frames for each phage were determined by RAST

1000 version 2.0 and by the Texas A&M Center for Phage Therapy structural analysis workflow version

1001 2020.01. Colored open reading frames correspond to functional prediction. Beneath the phage genome

1002 maps, TEM shows phage 9181, 9183 and 9184 are non-contractile tailed *Siphoviridae*. The *E. faecium*

1003 host strain for phage 9181 is *E. faecium* Com12. The host strain for phage 9183 and 9184 is *E.*

1004 *faecium* 1,141,733.

1005

1006 **Figure 2. Comparative genomic analysis identifies two novel enterococcal phage orthoclusters.**

1007 A comparative genome analysis was performed using OrthoMCL as described previously by Bolocan et  
1008 al. (16). A phylogenetic proteomic tree was constructed from the OrthoMCL matrix using the Manhattan  
1009 distance metric and hierarchical clustering using an average linkage with 1000 iterations. Ninety-nine  
1010 enterococcal phage genomes available from NCBI were used for comparison to *E. faecium* phages  
1011 9181, 9183, and 9184 (highlighted in red, emphasized by red arrows). Distinct phage orthoclusters are  
1012 represented by colored boxes. Roman numerals to the right of the shaded boxes signify the phage  
1013 orthocluster number. Phage orthocluster morphology is indicated by calipers (if known) or an asterisk  
1014 symbol (if unknown) to the right of the roman numerals.

1015

1016 **Figure 3. *E. faecium* phages demonstrate broad and narrow host ranges and plaque most**

1017 **efficiently on their laboratory host strain.** Host ranges of phage 9181, 9183, and 9184. Phage 9181

1018 and 9183 have a narrow *E. faecium* host range, while phage 9184 shows a broader host range.

1019 Bacteria were susceptible if less than  $1 \times 10^5$  CFU/mL of bacteria were recovered from a phage

1020 susceptibility assay. Bacteria were resistant if greater than  $1 \times 10^5$  CFU/mL of bacteria were recovered

1021 from a phage susceptibility assay. (A) Indicates host range for a collection of laboratory strains. (B)

1022 Indicates the host range for a collection of clinical isolates provided by the clinical microbiology lab at

1023 the University of Colorado, Anschutz Medical Campus. A white star signifies the *E. faecium* host strain

1024 utilized for phage propagation. Efficiency of plating assay shows that phage 9181 (C) and 9184 (D)

1025 plaque most efficiently on their laboratory host strains. Data represent the average of three

1026 replicates  $\pm$  the standard deviation. \*,  $P < 0.05$  and \*\*,  $P < 0.01$  by unpaired Student's t-test.

1027

1028 **Figure 4. *E. faecium* elicits a robust resistance phenotype to phage 9181 and 9183, but variable**

1029 **resistance to phage 9184.** Representative phage resistant strains raised against phages 9181 (A),

1030 9183 (B), and 9184 (C). Data show phage susceptibility assays and associated bacterial enumeration

1031 of wild type and phage resistant mutants in the presence (white bars) or absence (black bars) of phage

1032 from three independent experiments. Error bars indicate standard deviation. Phage 9181 resistant (A)

1033 and phage 9183 resistant (B) strains exhibit  $\geq 4$ -log of survival in the presence of phages compared to  
1034 the parental *E. faecium* Com12 and 1,141,733 (733) strains, respectively. Phage 9184 resistant strains  
1035 (C) exhibit diverse resistance strength characterized by weak (84R2) and strong (84R6) resistance  
1036 phenotypes. The dotted line indicates the spontaneous mutation threshold of wild type *E. faecium*,  
1037 which is defined as the mean CFU per ml at which spontaneous phage resistance is observed for the  
1038 wild type host strain of each phage.

1039

1040 **Figure 5. A diverse assortment of mutations confers phage resistance in *E. faecium*.** (A) Protein  
1041 secondary structure of *E. faecium* Com12 SagA, consisting of an N-terminus coiled-coil domain  
1042 (residues 18-242) and C-terminus NlpC\_P60 peptidoglycan hydrolase domain (residues 393-520).  
1043 Displayed above the protein structure are colored lollipops denoting the site of mutations within  
1044 NlpC\_P60 domain of phage 9181-resistant mutants. Inside and below the protein structure are colored  
1045 one letter amino acid abbreviations and lines, respectively, corresponding to key active site (red) and  
1046 peptidoglycan clamp residues (teal) of the NlpC\_P60 domain. Abbreviations: W, tryptophan; C,  
1047 Cysteine; H, Histidine; G, Glycine; D, Aspartate; L, Leucine; Y, Tyrosine; V, Valine. (B) Capsule locus  
1048 mutations are detected in a tyrosine kinase (*wze*), aminotransferase (*efsg\_rs08090*), *wzy*  
1049 (*efsg\_rs08105*), and nucleotide sugar dehydrogenase (*efsg\_rs08120*) of phage 9184-resistant mutants.  
1050 Arrows indicate open reading frames. Arrow colors correspond to colored boxes (figure bottom left)  
1051 indicate predicted open reading frame function (17). Colored lollipops above the arrows corresponding  
1052 to colored dots (figure bottom right) indicate the mutational type. *E. faecium* 1,141,733 locus tags are  
1053 angled below the arrows. (C) A missense mutation is found within a predicted arginine-aspartate-  
1054 aspartate protein (*rdc*; black arrow) of one phage 9184-resistant mutant (84R6) of *E. faecium*  
1055 1,141,733. *rdc* is flanked upstream by a predicted hypothetical protein (white arrow) and signal  
1056 sequence peptidase A (*sspA*; black arrow) and downstream by another hypothetical protein (white  
1057 arrow). *E. faecium* 1,141,733 locus tags are angled below the arrows. (D) Mutations in predicted  
1058 teichoic acid biosynthesis genes (*epaR* and *epaX*) are identified in phage 9183-resistant mutants of *E.*  
1059 *faecium* 1,141,733 (25). Arrow colors correspond to colored boxes (figure bottom left) indicate

1060 predicted open reading frame function. Colored lollipops above the arrows corresponding to colored  
1061 dots (figure bottom right) indicate the mutational type. *E. faecium* 1,141,733 locus tags are angled  
1062 below the arrows. The brackets above the locus correspond the conserved (left) and variable (right)  
1063 portions of the *epa* locus proposed to by Gueredal et al. to encode the machinery necessary for  
1064 rhamnopolysaccharide synthesis and wall teichoic acid biosynthesis, respectively (25).

1065

1066 **Figure 6. Mutation in the capsule and exopolysaccharide loci limit phage adsorption in *E.***  
1067 ***faecium*.** Shown is the percentage phage adsorption in phage 9181 (A), 9183 (B), and 9184 (C)  
1068 compared to parental strains, *E. faecium* Com12 and *E. faecium* 1,141,733, respectively. Results  
1069 represent average percent adsorption and standard deviation from three independent experiments. \*\*\*,  
1070  $P < 0.001$ ; \*\*\*\*,  $P < 0.0001$  by unpaired Student's *t* test.

1071

1072 **Figure 7. Phage 9181 and phage 9183 synergize with antibiotics to inhibit the growth of *E.***  
1073 ***faecium*.** (A-E) *E. faecium* growth was monitored over 18 hours in the presence of phage (open blue  
1074 squares), sub-inhibitory concentrations of antibiotics (open orange, grey, purple triangles or diamonds),  
1075 both phage and sub-inhibitory concentration of antibiotics (filled orange, grey and purple triangles or  
1076 diamonds), or media alone (open black circles). Phage 9181 was used in experiments with *E. faecium*  
1077 Com12, while phage 9183 was employed for experiments with 1,141,733. Phages 9181 (A) and 9183  
1078 (B) synergize with sub-inhibitory concentration of ampicillin (AMP) in a dose responsive manner to slow  
1079 the growth of *E. faecium* Com12 and 1,141,733, respectively. Phage 9181 (C) and 9183 (D) synergize  
1080 with sub-inhibitory concentrations of ceftriaxone (CTX) to inhibit the growth of *E. faecium* Com12 and  
1081 1,141,733, respectively. Phage 9183 (E) synergizes with sub-inhibitory concentrations of daptomycin  
1082 (DAP) in a dose-responsive manner to inhibit *E. faecium* 1,141,733. Three technical replicates were  
1083 performed for each condition tested and the averages plotted. Error bars indicate standard deviation.  
1084 Shown are the results from one experiment that was replicated in triplicate.

1085

1086 **Supplemental Figure Legends**

1087 **Figure S1. PCR screen for phage lysogeny in phage resistant mutants.** A molecular weight marker  
1088 with corresponding band sizes in base pairs (i.e. bp) is shown at the far left and right of each gel image.  
1089 (A) PCR screen for phage 9181 lysin gene in *E. faecium* or phage 9181 genomic DNA. Lane numbers  
1090 correspond to the following genomic DNA samples: 1) 81R3, 2) 81R4, 3) 81R5, 4) 81R6, 5) 81R7, 6)  
1091 81R8, 7) *E. faecium* Com12, 8) Phage 9181, 9) negative control. (B) PCR screen for phage 9183  
1092 integrase gene in *E. faecium* or phage 9183 genomic DNA. Lane numbers correspond to the following  
1093 genomic DNA samples: 1) 83R1, 2) 83R2, 3) 83R3, 4) 83R4, 5) 83R5, 6) 83R6, 7) 83R7, 8) 83R8, 9) *E.*  
1094 *faecium* 1,141,733, 10) Phage 9183, 11) negative control. (C) PCR screen for phage 9184 lysin gene  
1095 in *E. faecium* or phage 9184 genomic DNA. Lane numbers correspond to the following genomic DNA  
1096 samples: 1) 84R1, 2) 84R2, 3) 84R3, 4) 84R4, 5) 84R5, 6) 84R6, 7) 84R8, 8) *E. faecium* 1,141,733, 9)  
1097 phage 9184, 10) negative control.

1098

1099 **Figure S2. *Enterococcus faecium* phage orthoclusters.** Phage protein coding sequence alignments  
1100 were performed with nearest neighbors in VIP Tree (71, 76). Colored lines connecting genomes  
1101 indicate percent protein identity along the length of each genome. (A) Phage 9183 demonstrates  
1102 protein homology and similar genome organization to its nearest neighbor intra-orthocluster phages  
1103 (phages VFW and VPE25). (B) Phage 9184 demonstrates proteome homology and similar genome  
1104 organization to its nearest neighbor intra-orthocluster phages (phages vB EfaS-DELFI and IME-EFm5).  
1105 (C) Phage 9181 shows little to no protein homology to its nearest neighbor extra-orthocluster phages  
1106 (phages EFC-1 and FLA4).

1107

1108 **Figure S3. Phage resistant mutants of *E. faecium* following exposure to phages 9181, 9183 and**  
1109 **9184.** Phage 9181 (A), 9183 (B), and 9184 (C) susceptibility assays and associated bacterial  
1110 enumeration of wild type and phage resistant mutants in the presence (white bars) or absence (black  
1111 bars) of phage (A-F) from three independent experiments. Phage 9181 (A, D) and phage 9183 (B, E)  
1112 resistant strains exhibit  $\geq 5$ -logs of survival versus *E. faecium* Com12 and 1,141,733 (i.e. 733),  
1113 respectively. Phage 9184 (C, F) resistant strains exhibit a weak resistance phenotypes. The dotted line



1114 indicates the spontaneous mutation threshold conferring phage resistance observed in the respective  
1115 wild type host strain of each phage. The threshold was placed to aid in discriminating weak phage  
1116 resistance phenotypes versus the parental strain.

1117

1118 **Figure S4. SagA is conserved in *E. faecium* Com12 and Com15 and SagA is expressed in *sagA***  
1119 **mutants.** (A) Displayed is the BLASTP alignment of SagA between Com12 and Com15, showing 95%  
1120 similarity and strict conservation of peptidoglycan clamp (orange lettering) and active site residues (red  
1121 lettering). Colored highlights indicate the location of amino acid changes detected in phage 9181  
1122 resistant mutants (81R3 and 81R4 – green highlight, 81R5 – yellow highlight, 81R6 – blue highlight,  
1123 81R8 – magenta highlight). Specific amino acid changes are noted below the alignment in parentheses  
1124 next to their respective phage resistant mutant. (B) Growth of *E. faecalis* OG1RF, *E. faecium* Com15,  
1125 Com12 (WT) and *sagA* mutants (81R3-6; 81R8) are similar in BHI, except for 81R6. (C,D) Displayed is  
1126 the whole protein fraction (upper panel; Stain-Free) and Western Blot of SagA (lower panel;  $\alpha$ -SagA)  
1127 taken from the exponential phase ( $OD_{600} \sim 0.8$ ) supernatants (C) or cell pellets (D) of *E. faecalis*  
1128 OG1RF, *E. faecium* Com15, Com12 (WT), and *sagA* mutants (81R3-6; 81R8). Protein band sizes are  
1129 demonstrated to the left of each panel in kilodaltons (kDa).

1130

1131 **Figure S5. Complementation restores phage susceptibility in phage resistant mutants.**

1132 Bacterial enumeration from Phage 9181 (A and B), 9184 (C), and 9183 (D) phage susceptibility assays  
1133 of wild type and phage resistant mutants complemented with their respective wild type allele or empty  
1134 vector. Assays were performed in the presence (white bars) or absence (black bars) of phages from  
1135 two independent experiments. The bars and error bars indicate the average and standard deviation  
1136 from two independent experiments. The dotted line indicates the spontaneous mutation threshold  
1137 conferring phage resistance observed in the respective wild type host strain of each phage.

1138

1139 **Figure S6. Complementation restores phage adsorption in phage resistant mutants.** Percentage  
1140 phage adsorption of phage resistant mutants, complemented phage resistant mutants, or their parental

1141 strains to Phage 9181 (A), 9183 (B), and 9184 (C). Parental and phage resistant mutants were  
1142 complemented with the empty vector (E; pLZ12a) and compared to their complemented phage resistant  
1143 mutant strain. Data represent the mean percent adsorption and standard deviation from three  
1144 independent experiments. \*,  $P < 0.05$ ; \*\*\*,  $P < 0.001$ ; \*\*\*\*,  $P < 0.0001$ ; ns, non-significant by unpaired  
1145 Student's *t* test.  
1146

### 9181

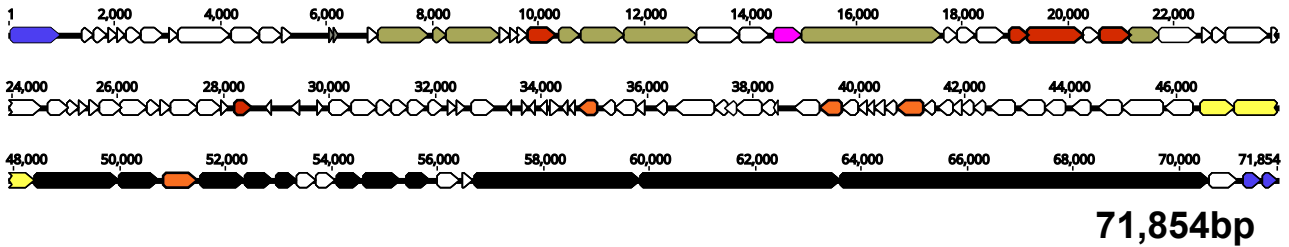

### 9183

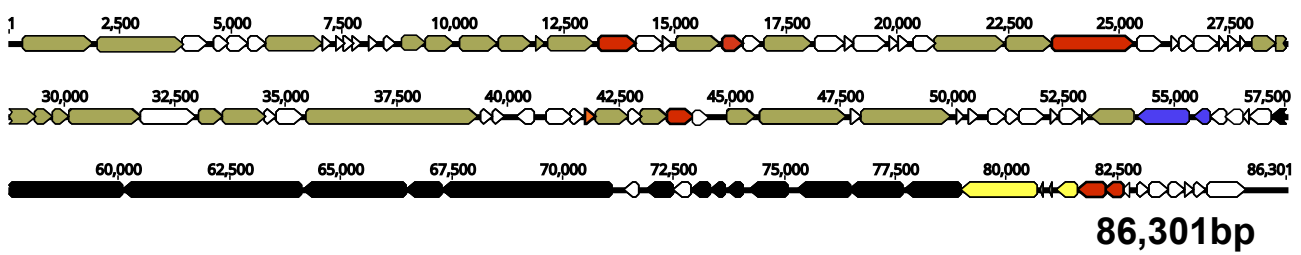

### 9184

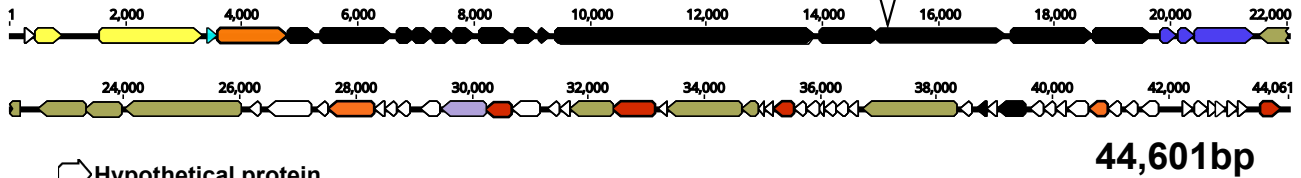

- Functional annotation**
- Hypothetical protein
  - Replication
  - DNA packaging
  - Structural morphogenesis
  - Restriction modification
  - Glycosyltransferase
  - Sensor histidine kinase
  - DUF-associated protein
  - Host cell lysis
  - tRNA
  - Metallo-β-lactamase
  - Sequencing gap

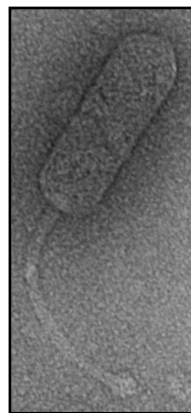

9181

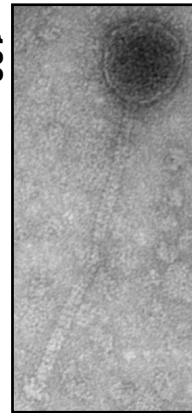

9183

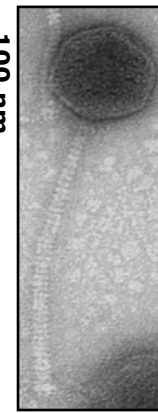

9184

Figure 1

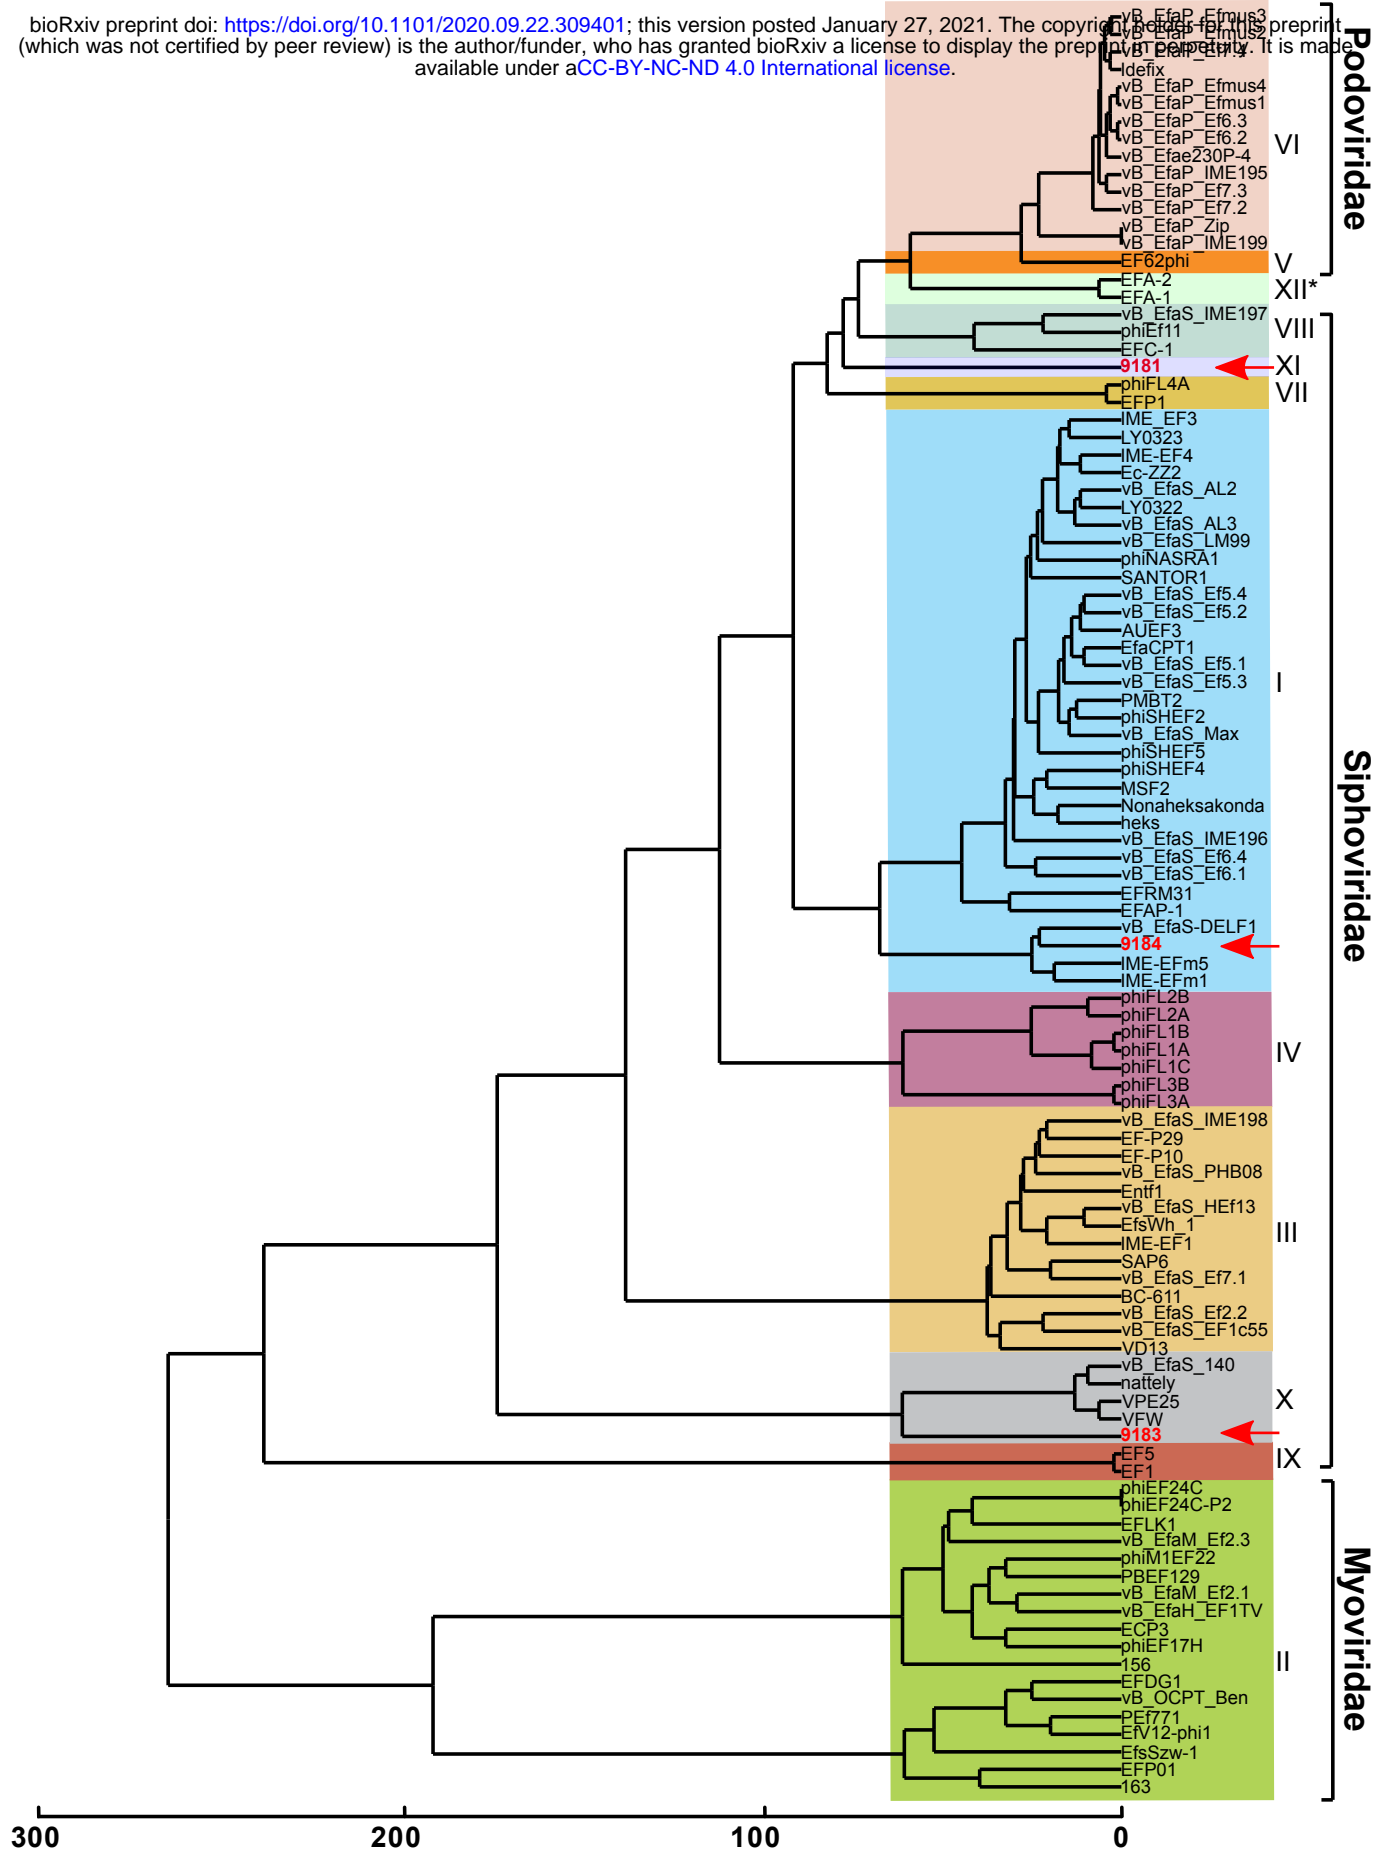

Figure 2

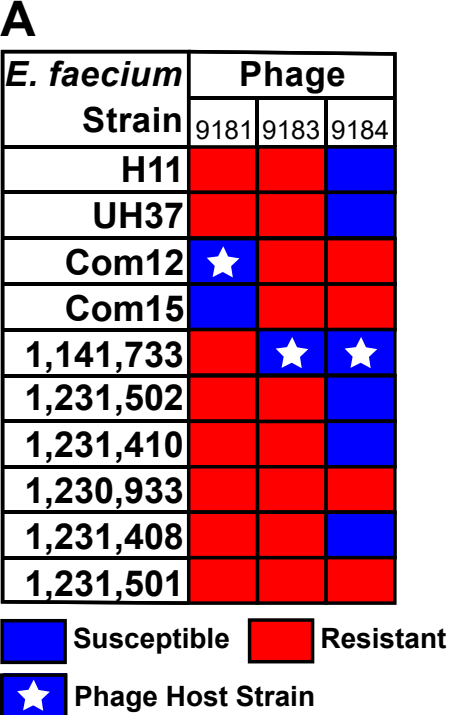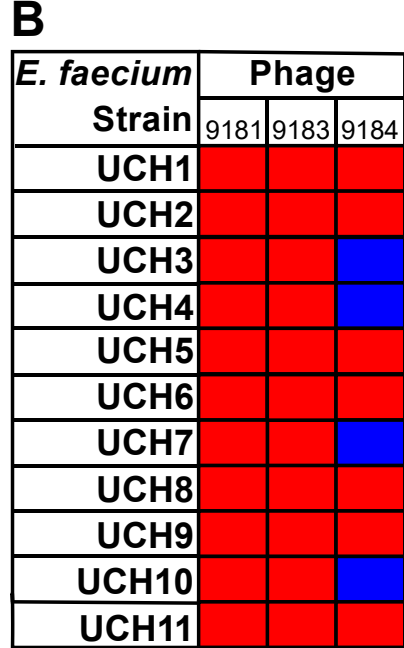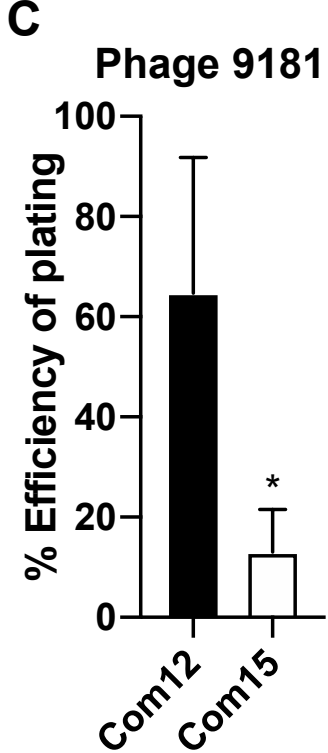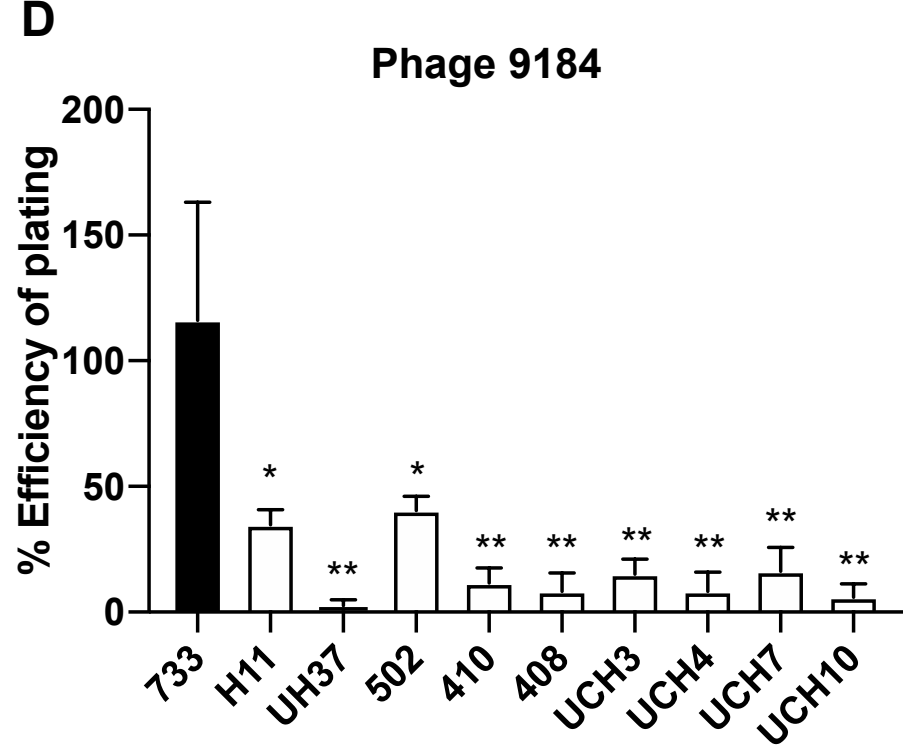

**Figure 3**

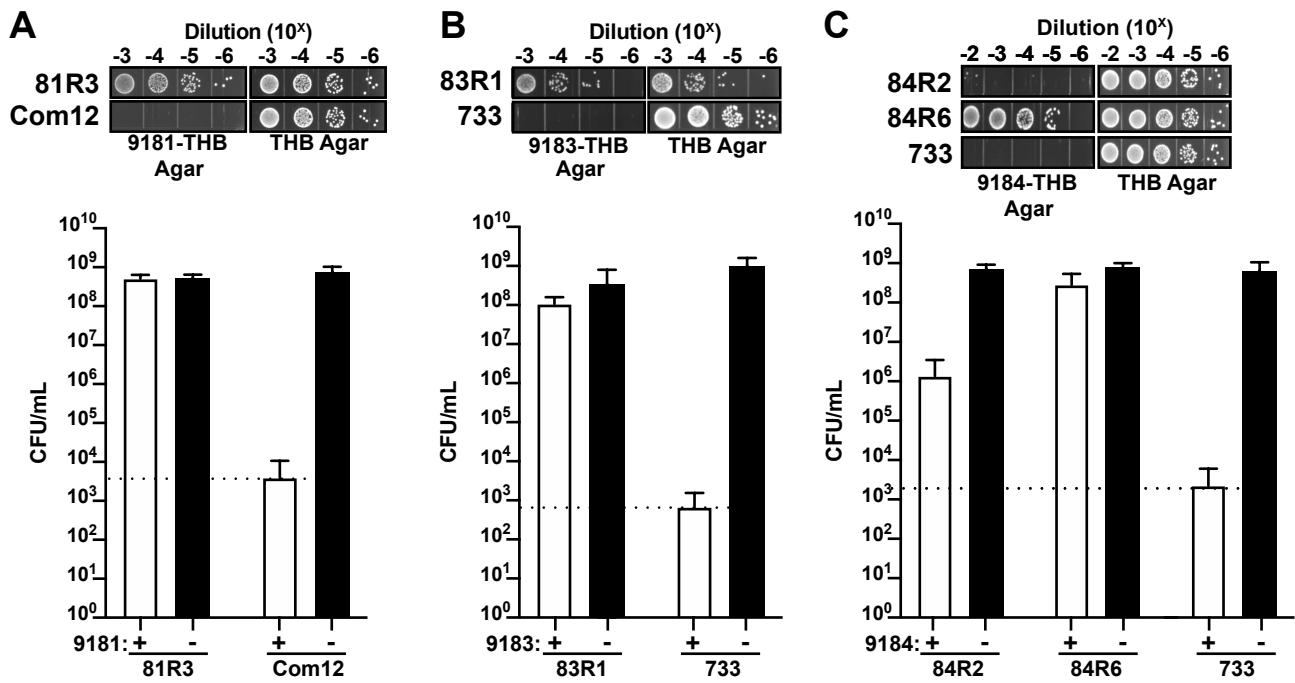

Figure 4

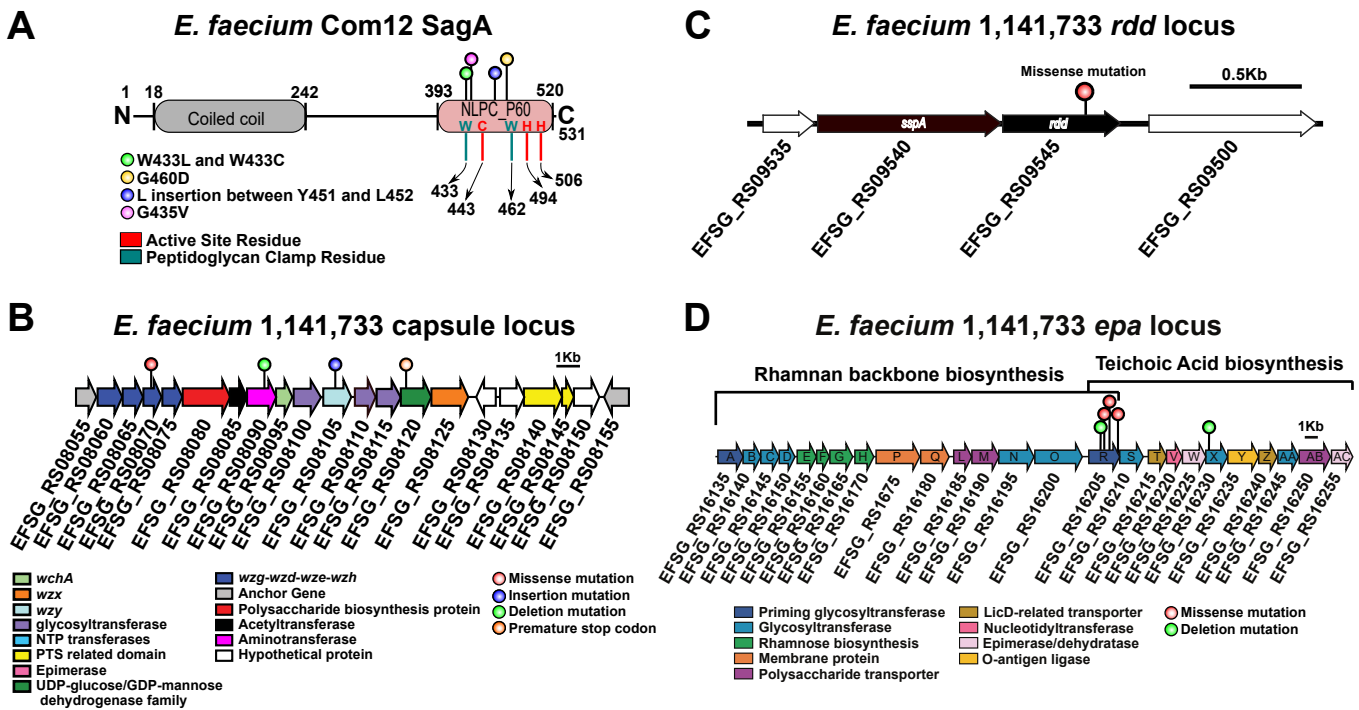

Figure 5



**A**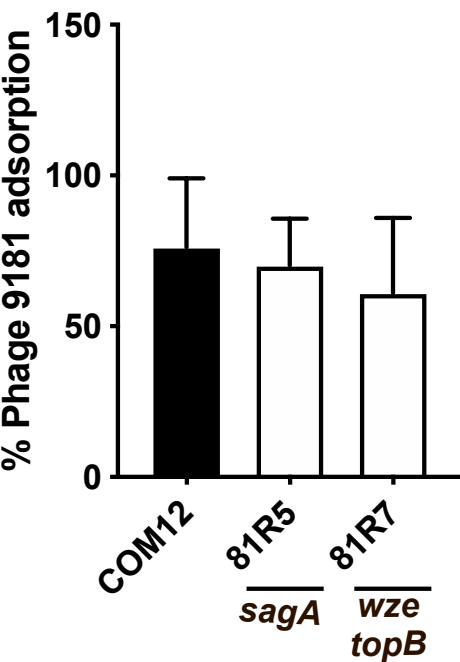**B**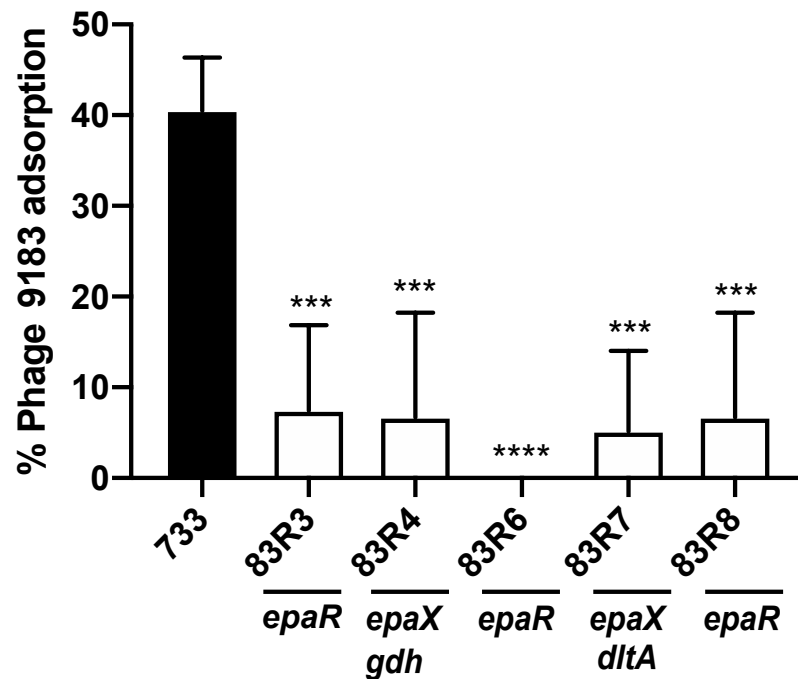**C**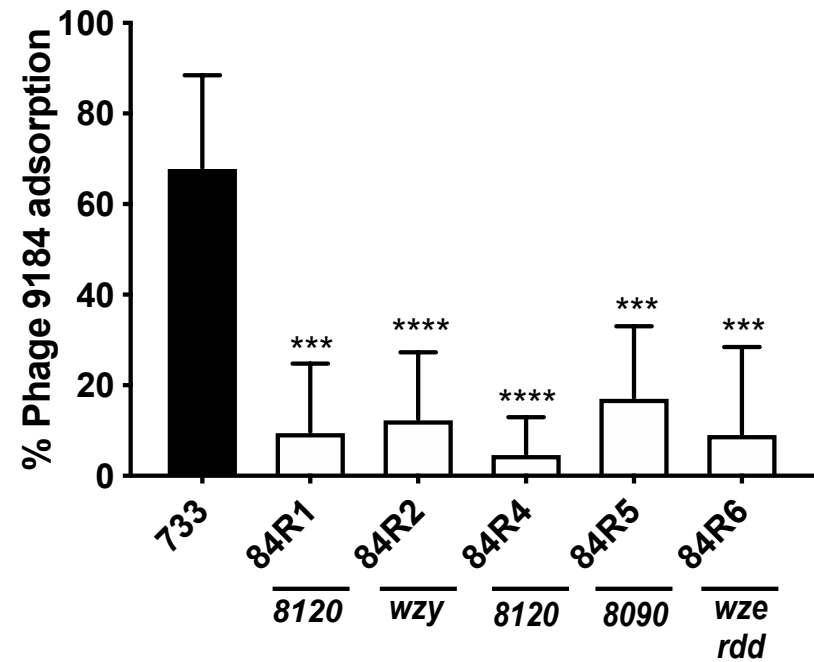**Figure 6**

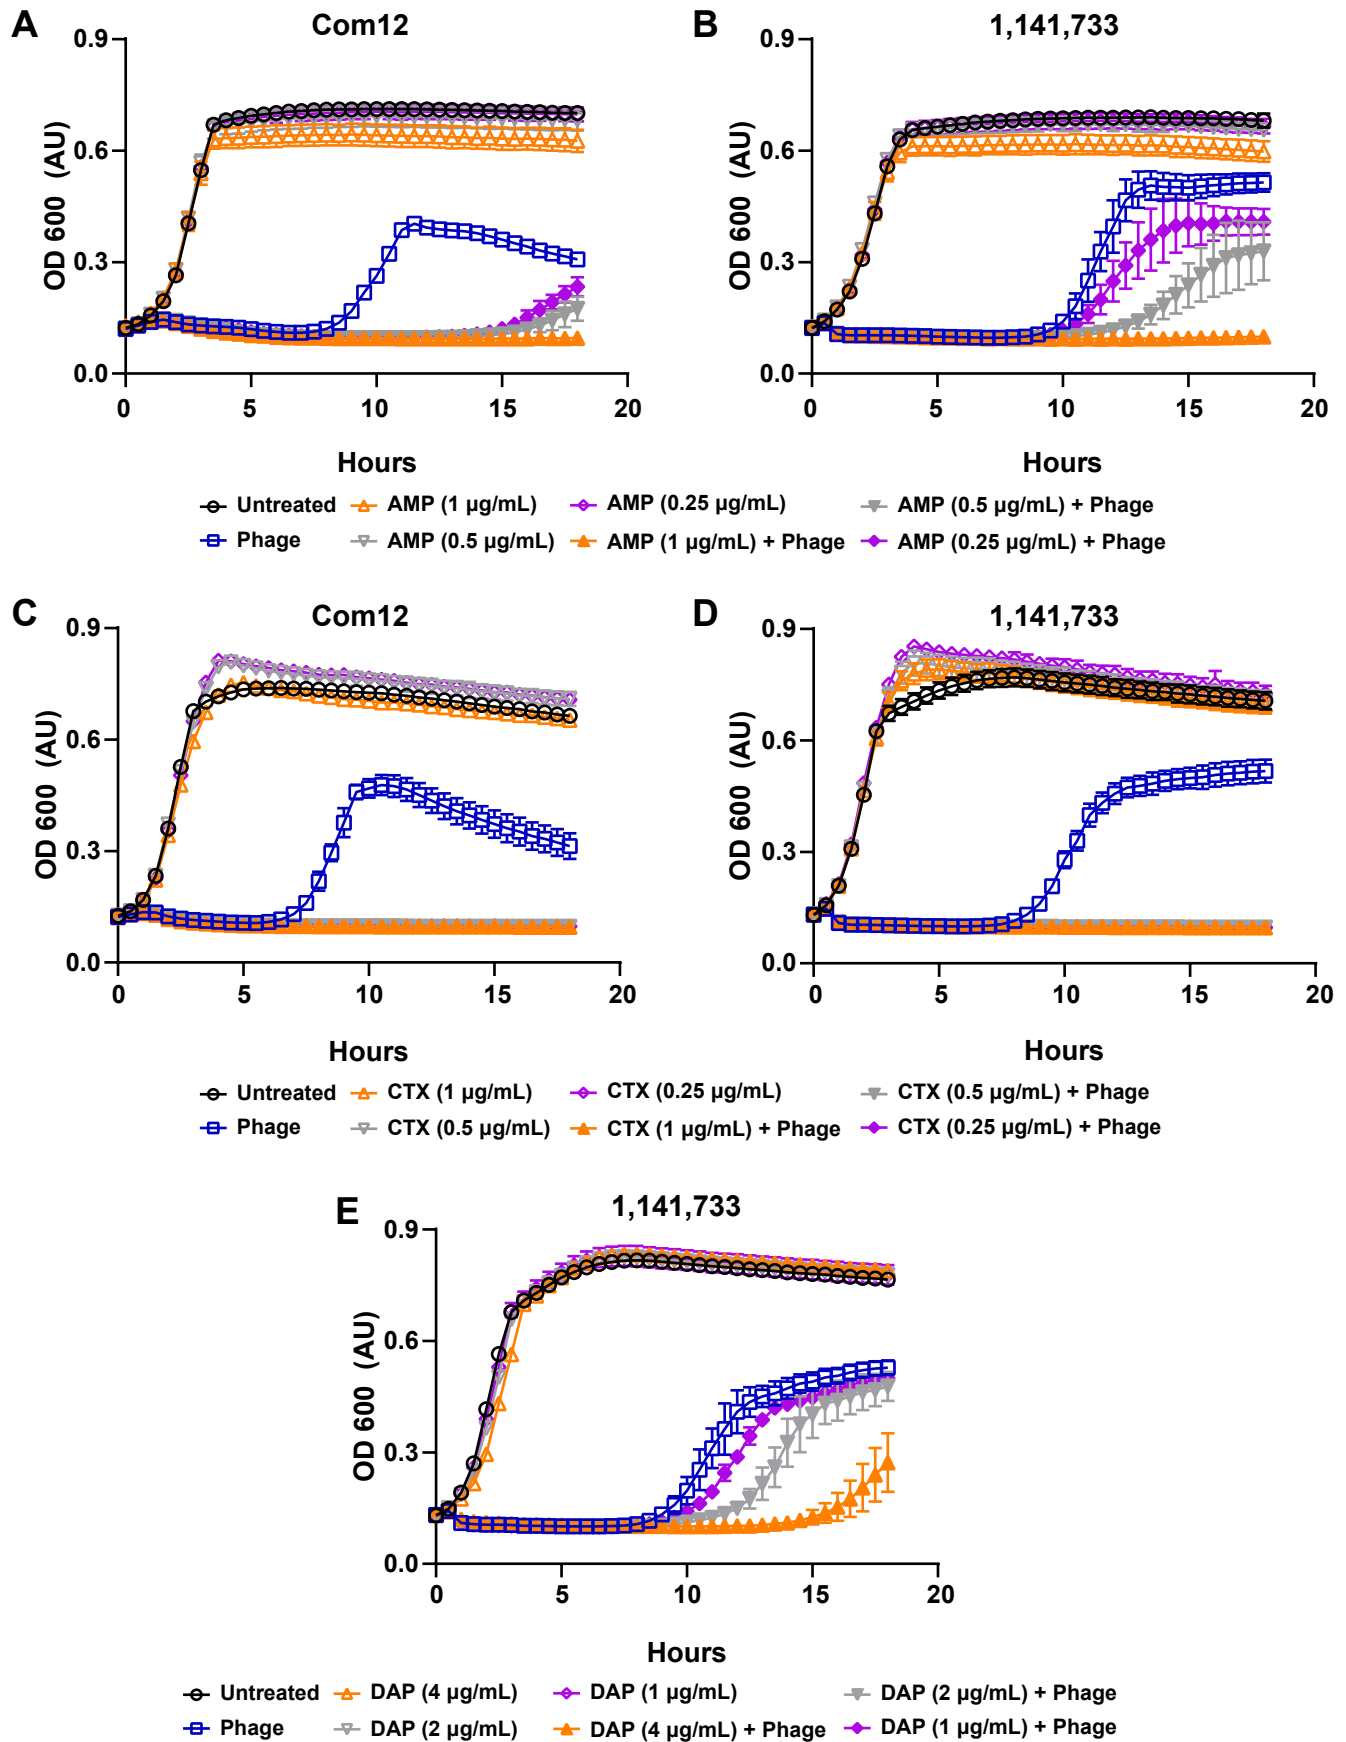

Figure 7

**Table 1. Phages, *E. faecium* host strain, and phage resistant mutants**

| <b>Phage</b> | <b><i>E. faecium</i><br/>host strain</b> | <b>Phage<br/>resistant mutants</b> | <b>Number of Phage<br/>Resistant mutants</b> |
|--------------|------------------------------------------|------------------------------------|----------------------------------------------|
| 9181         | Com12                                    | 81R3-R8                            | 6                                            |
| 9183         | 1,141,733                                | 83R1-R8                            | 8                                            |
| 9184         | 1,141,733                                | 84R1-R6, 84R8                      | 7                                            |
